# Supplementary material
Source: PubMed Central journal article supplement (PMC2672818)
Supplement: d-65-00485-sup1.pdf [file d-65-00485-sup1.pdf]

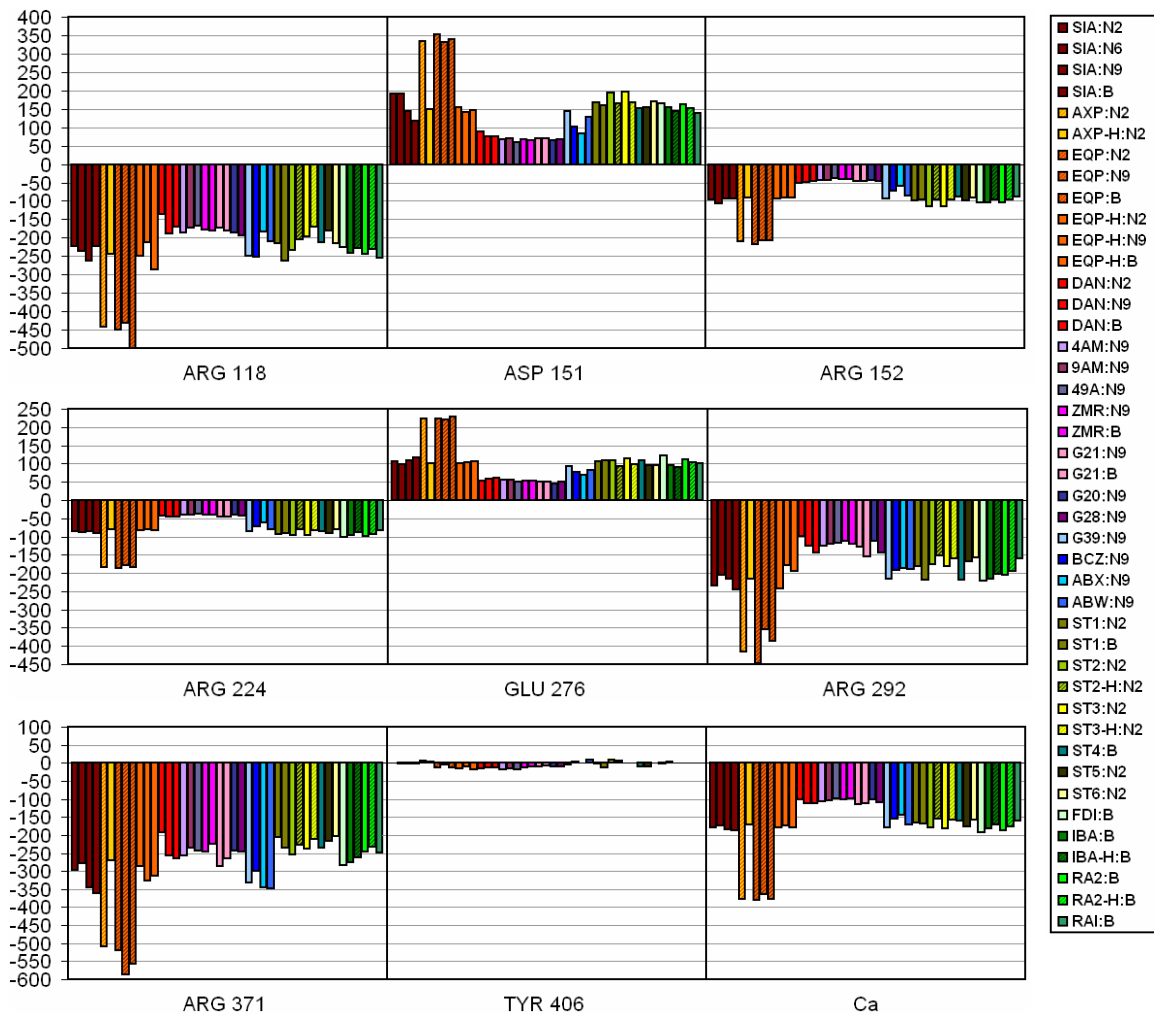

**Figure S1.** Individual contributions from conserved functional residues and calcium ion to electrostatic energies of neuraminidase interaction with the inhibitor C2-group [kJ/mol].

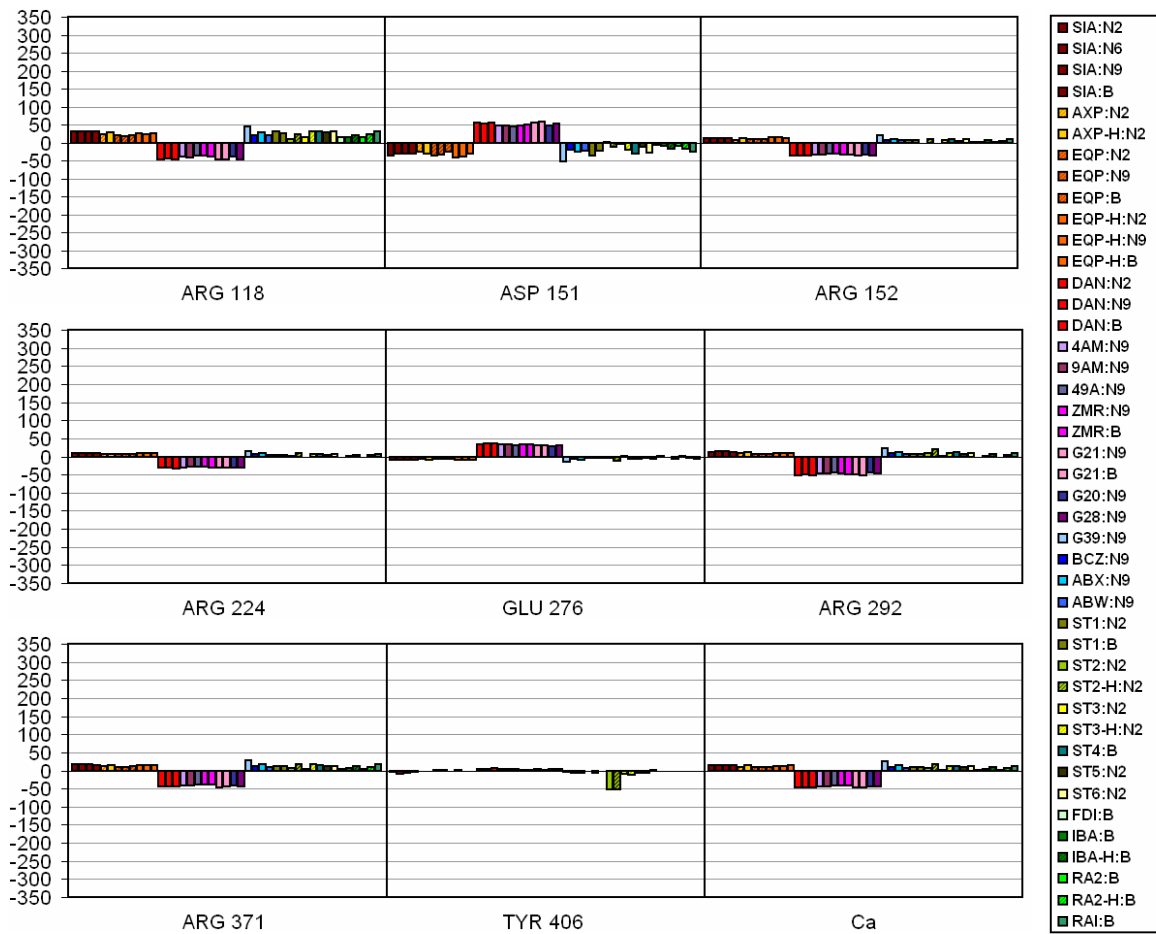

**Figure S2.** Individual contributions from conserved functional residues and calcium ion to electrostatic energies of neuraminidase interaction with the inhibitor C3-group [kJ/mol].

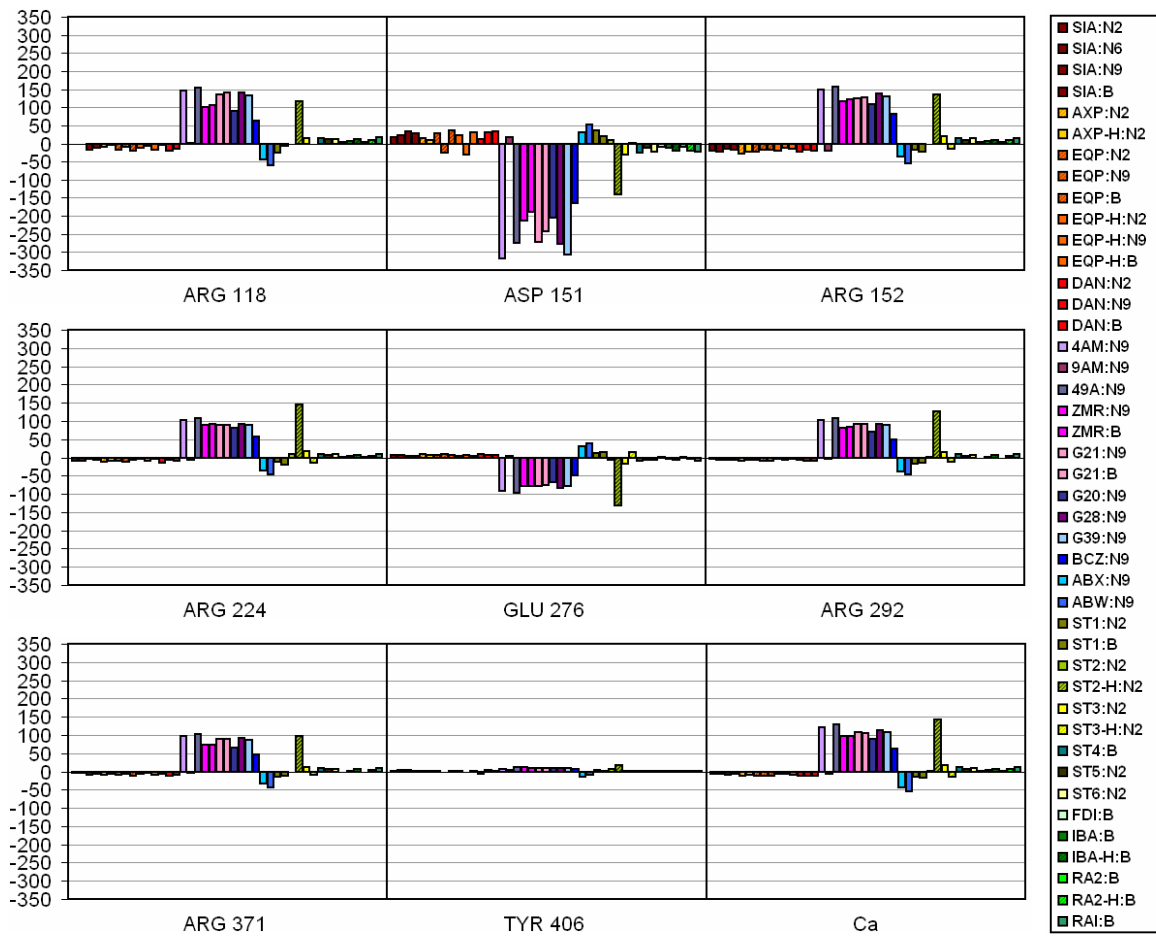

**Figure S3.** Individual contributions from conserved functional residues and the calcium ion to electrostatic energies of neuraminidase interaction with the inhibitor C4-group [kJ/mol].

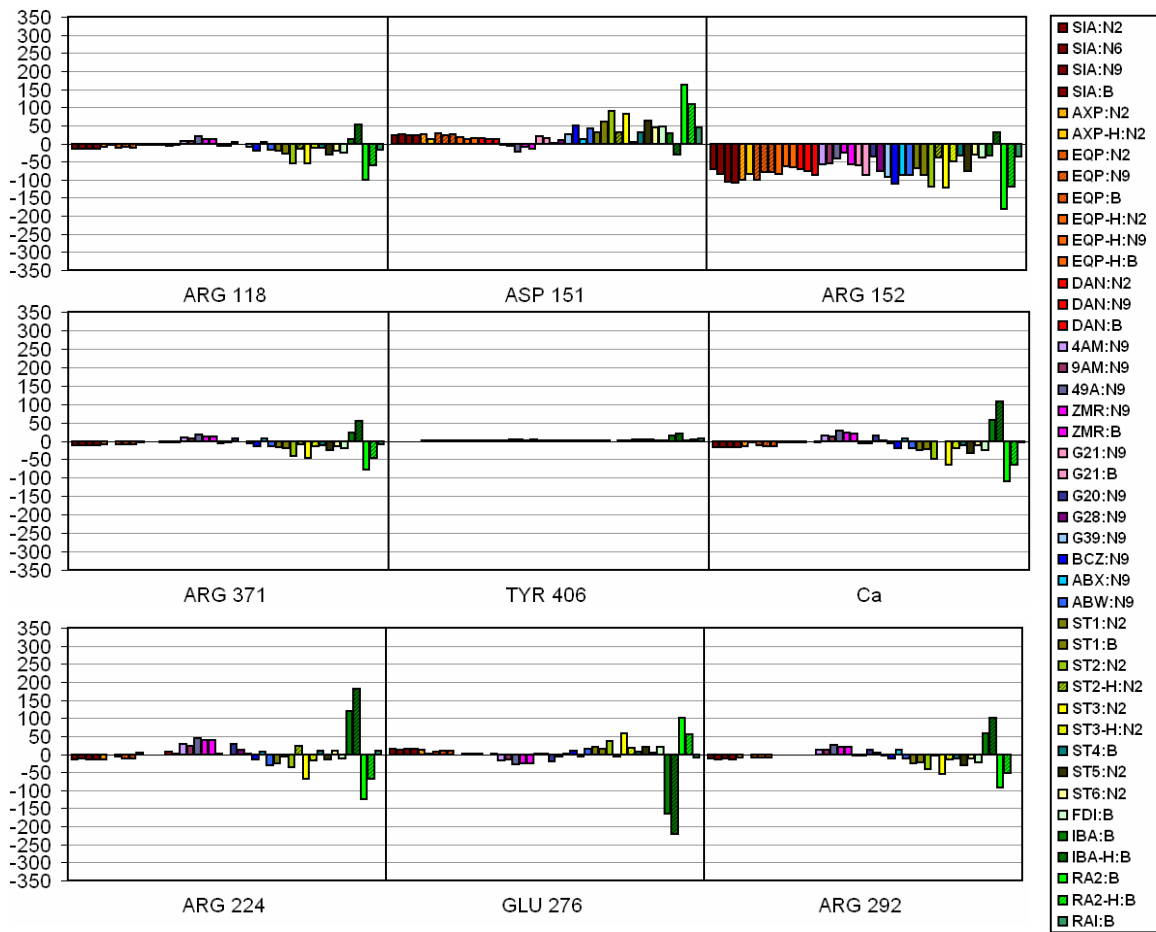

**Figure S4.** Individual contributions from conserved functional residues and the calcium ion to electrostatic energies of neuraminidase interaction with the inhibitor C5 group [kJ/mol].

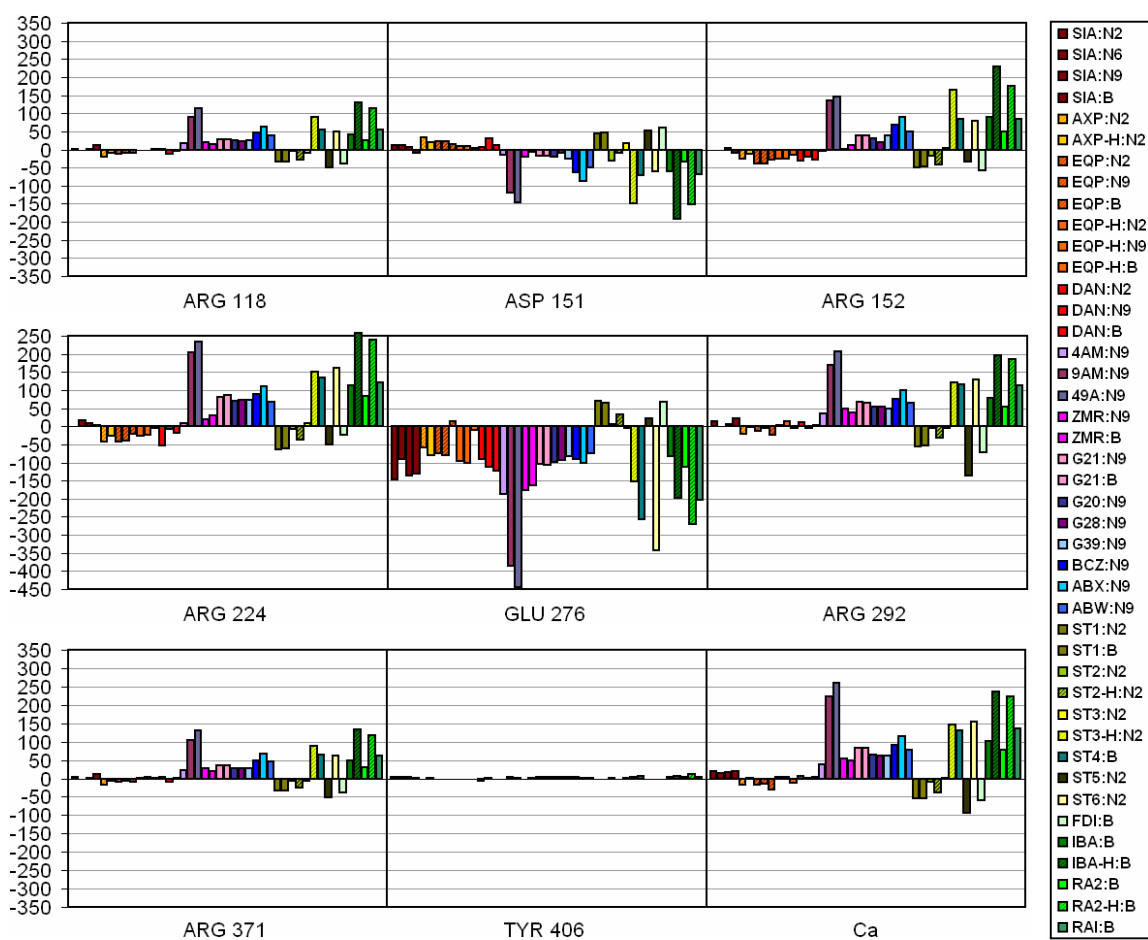

**Figure S5.** Individual contributions from conserved functional residues and the calcium ion to electrostatic energies of neuraminidase interaction with the inhibitor C6-group [kJ/mol].

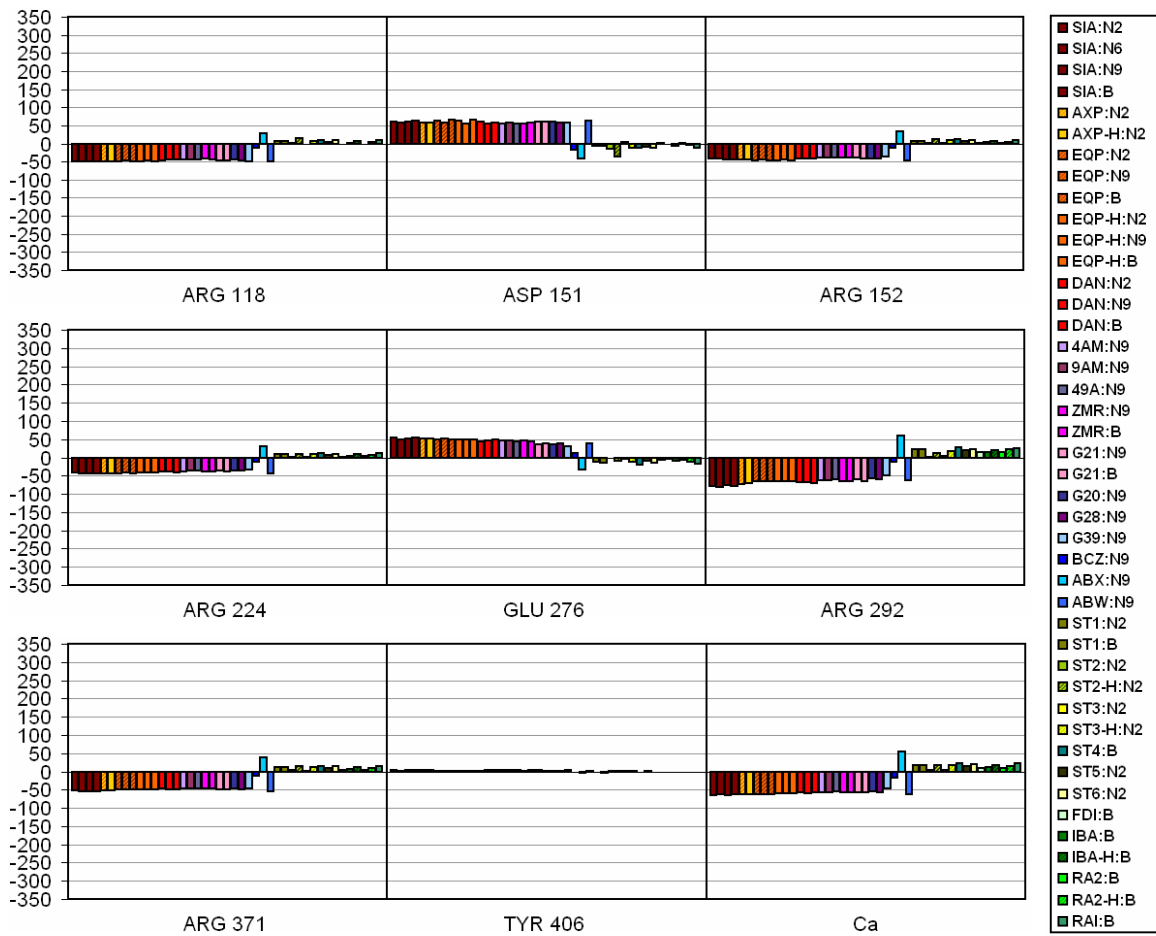

**Figure S6.** Individual contributions from conserved functional residues and the calcium ion to electrostatic energies of neuraminidase interaction with the inhibitor O-group [kJ/mol].

**Table S1.** *Influenza* neuraminidase:inhibitor complexes.

| No. | PDB code <sup>a</sup> | Mutation <sup>b</sup> | Protein charge <sup>c</sup> | Inhibitor <sup>d</sup> | Inhibitor charge | pK <sub>i</sub> <sup>exp</sup> | pIC <sub>50</sub> <sup>exp</sup>                           |
|-----|-----------------------|-----------------------|-----------------------------|------------------------|------------------|--------------------------------|------------------------------------------------------------|
| 1   | N2 <sup>e</sup>       | 2BAT                  | Asp339Asn                   | 2                      | SIA              | -1                             | ~3.00 <sup>1</sup>                                         |
| 2   | N2                    | 1INW                  |                             | 2                      | AXP              | -2                             | -                                                          |
| 3   | N2                    | 1INW                  |                             | 2                      | AXP-H            | -1                             | like SIA <sup>2</sup>                                      |
| 4   | N2                    | 1INX                  |                             | 1                      | EQP              | -2                             | -                                                          |
| 5   | N2                    | 1INX                  |                             | 1                      | EQP-H            | -1                             | ~4.00 <sup>3</sup>                                         |
| 6   | N2                    | 1IVF                  |                             | 1                      | DAN              | -1                             | 5.40, <sup>4</sup> 5.82 <sup>5</sup>                       |
| 7   | N2                    | 1IVD                  |                             | 1                      | ST1              | -1                             | -                                                          |
| 8   | N2                    | 1IVC                  |                             | 1                      | ST2              | -1                             | -                                                          |
| 9   | N2                    | 1IVC                  |                             | 1                      | ST2-H            | 0                              | <2.00 <sup>7</sup>                                         |
| 10  | N2                    | 1IVE                  |                             | 1                      | ST3              | -1                             | -                                                          |
| 11  | N2                    | 1IVE                  |                             | 1                      | ST3-H            | 0                              | <2.00 <sup>8</sup>                                         |
| 12  | N2                    | 1ING:A                |                             | 1                      | ST5              | -1                             | -                                                          |
| 13  | N2                    | 1ING:B                |                             | 1                      | ST5              | -1                             | 2.40 <sup>9</sup>                                          |
| 14  | N2                    | 1INH:A                |                             | 1                      | ST6              | 0                              | -                                                          |
| 15  | N2                    | 1INH:B                |                             | 1                      | ST6              | 0                              | 2.30 <sup>9</sup>                                          |
| 16  | N6 <sup>f</sup>       | 1W1X:A                |                             | 2                      | SIA              | -1                             | -                                                          |
| 17  | N6                    | 1W1X:B                |                             | 3                      | SIA              | -1                             | -                                                          |
| 18  | N6                    | 1W1X:C                |                             | 3                      | SIA              | -1                             | -                                                          |
| 19  | N6                    | 1W1X:D                |                             | 2                      | SIA              | -1                             | -                                                          |
| 20  | N6                    | 1W20:A                |                             | 2                      | SIA              | -1                             | -                                                          |
| 21  | N6                    | 1W20:B                |                             | 2                      | SIA              | -1                             | -                                                          |
| 22  | N6                    | 1W20:C                |                             | 2                      | SIA              | -1                             | -                                                          |
| 23  | N6                    | 1W20:D                |                             | 2                      | SIA              | -1                             | -                                                          |
| 24  | N6                    | 1W21:A                |                             | 2                      | SIA              | -1                             | -                                                          |
| 25  | N6                    | 1W21:B                |                             | 2                      | SIA              | -1                             | -                                                          |
| 26  | N6                    | 1W21:C                |                             | 2                      | SIA              | -1                             | -                                                          |
| 27  | N6                    | 1W21:D                |                             | 2                      | SIA              | -1                             | -                                                          |
| 28  | N9 <sup>g</sup>       | 1MWE                  |                             | -1                     | SIA              | -1                             | 4.26 <sup>10</sup>                                         |
| 29  | N9                    | 2QWB                  | Arg292Lys <sup>h</sup>      | -1                     | SIA              | -1                             | 2.74 <sup>11</sup>                                         |
| 30  | N9                    | 1INY                  | Ser370Leu                   | -1                     | EQP              | -2                             | -                                                          |
| 31  | N9                    | 1INY                  | Ser370Leu                   | -1                     | EQP-H            | -1                             | ~3.00 <sup>12</sup>                                        |
| 32  | N9                    | 1F8B                  |                             | -1                     | DAN              | -1                             | 5.30, <sup>13</sup> 5.58 <sup>14</sup>                     |
| 33  | N9                    | 1NNB                  |                             | -1                     | DAN              | -1                             | -                                                          |
| 34  | N9                    | 2QWC                  | Arg292Lys <sup>h</sup>      | -1                     | DAN              | -1                             | 3.55 <sup>15</sup>                                         |
| 35  | N9                    | 1F8C                  |                             | -1                     | 4AM              | 0                              | 6.83, <sup>16</sup> 7.40, <sup>17</sup> 7.41 <sup>18</sup> |
| 36  | N9                    | 2QWD                  | Arg292Lys <sup>h</sup>      | -1                     | 4AM              | 0                              | 4.85 <sup>19</sup>                                         |
| 37  | N9                    | 1F8D                  |                             | -1                     | 9AM              | 0                              | 3.40 <sup>20</sup>                                         |
| 38  | N9                    | 1F8E                  |                             | -1                     | 49A              | 1                              | 4.82 <sup>21</sup>                                         |
| 39  | N9                    | 1NNC                  |                             | -1                     | ZMR              | 0                              | 8.71, <sup>22</sup> 8.89, <sup>23</sup> 9.19 <sup>18</sup> |
| 40  | N9                    | 2QWE                  | Arg292Lys <sup>h</sup>      | -1                     | ZMR              | 0                              | 7.48 <sup>24</sup>                                         |
| 41  | N9                    | 1BJI                  |                             | 0                      | G21              | 0                              | 9.19 <sup>18</sup>                                         |
| 42  | N9                    | 2QWF                  | Arg292Lys <sup>h</sup>      | 0                      | G20              | 0                              | 5.67 <sup>25</sup>                                         |
| 43  | N9                    | 2QWI                  |                             | 0                      | G20              | 0                              | 8.36, <sup>26</sup> 9.28 <sup>18</sup>                     |
| 44  | N9                    | 2QWG                  | Arg292Lys <sup>h</sup>      | 0                      | G28              | 0                              | -                                                          |
| 45  | N9                    | 2QWJ                  |                             | -1                     | G28              | 0                              | 9.41 <sup>18</sup>                                         |
| 46  | N9                    | 2QWH                  | Arg292Lys <sup>h</sup>      | -1                     | G39              | 0                              | -                                                          |
|     |                       |                       |                             |                        |                  |                                | <4.52, <sup>29</sup> 4.89 <sup>30</sup>                    |

|    |                  |        |                        |    |       |    |                                        |                                                            |
|----|------------------|--------|------------------------|----|-------|----|----------------------------------------|------------------------------------------------------------|
| 47 | N9               | 2QWK   |                        | 0  | G39   | 0  | 9.96 <sup>31</sup>                     | 8.70, <sup>32</sup> 9.10 <sup>33</sup>                     |
| 48 | N9               | 1L7F   |                        | 0  | BCZ   | 0  | 10.82 <sup>34</sup>                    |                                                            |
| 49 | N9               | 1L7G   | Glu119Gly <sup>h</sup> | 1  | BCZ   | 0  | -                                      |                                                            |
| 50 | N9               | 1L7H   | Arg292Lys <sup>h</sup> | 0  | BCZ   | 0  | -                                      |                                                            |
| 51 | N9               | 1XOE   |                        | -1 | ABX   | 0  | 6.82, <sup>35</sup> 7.43 <sup>36</sup> | 7.39 <sup>37</sup>                                         |
| 52 | N9               | 1XOG   |                        | -1 | ABW   | -1 | -                                      | 6.39 <sup>38</sup>                                         |
| 53 | B/B <sup>i</sup> | 1NSC:A |                        | 4  | SIA   | -1 | -                                      | <2.00, <sup>39</sup> 3.00 <sup>40</sup>                    |
| 54 | B/B              | 1NSC:B |                        | 4  | SIA   | -1 |                                        |                                                            |
| 55 | B/L <sup>j</sup> | 1INV   |                        | 3  | EQP   | -2 | -                                      | ~4.00 <sup>41</sup>                                        |
| 56 | B/L              | 1INV   |                        | 3  | EQP-H | -1 |                                        |                                                            |
| 57 | B/B              | 1NSD:A |                        | 4  | DAN   | -1 | -                                      | 4.82 <sup>9</sup>                                          |
| 58 | B/B              | 1NSD:B |                        | 4  | DAN   | -1 |                                        |                                                            |
| 59 | B/B              | 1A4G:A |                        | 4  | ZMR   | 0  | 8.85 <sup>42</sup>                     |                                                            |
| 60 | B/B              | 1A4G:B |                        | 4  | ZMR   | 0  |                                        |                                                            |
| 61 | B/B              | 1A4Q:A |                        | 4  | G21   | 0  | -                                      | 5.07 <sup>42</sup>                                         |
| 62 | B/B              | 1A4Q:B |                        | 4  | G21   | 0  |                                        |                                                            |
| 63 | B/L              | 1IVB   |                        | 3  | ST1   | -1 | -                                      | 3.12 <sup>43</sup>                                         |
| 64 | B/L              | 1INF   | Arg382Lys              | 3  | ST4   | 0  | -                                      | 5.00 <sup>9</sup>                                          |
| 65 | B/L              | 1B9S   |                        | 4  | FDI   | -1 | -                                      | <3.18 <sup>44,45</sup>                                     |
| 66 | B/L              | 1VCJ   |                        | 3  | IBA   | 0  | -                                      | 4.59 <sup>46</sup>                                         |
| 67 | B/L              | 1VCJ   |                        | 3  | IBA-H | 1  |                                        |                                                            |
| 68 | B/L              | 1B9V   |                        | 4  | RA2   | -1 | -                                      | 3.57, <sup>47</sup> 3.65, <sup>48</sup> 3.98 <sup>49</sup> |
| 69 | B/L              | 1B9V   |                        | 4  | RA2-H | 0  |                                        |                                                            |
| 70 | B/L              | 1B9T   |                        | 3  | RAI   | 0  | -                                      | 5.10 <sup>50,49</sup>                                      |

<sup>a</sup> Chain identifier is denoted after colon.

<sup>b</sup> Residue numbers like in original PDB structures.

<sup>c</sup> The charge of polipeptide chain plus calcium ion.

<sup>d</sup> Inhibitors and their protonation state used in calculations are shown in **Scheme 1**.

<sup>f</sup> A/Tokyo/3/67 (H2N2)

<sup>e</sup> A/duck/England/56(H11N6)

<sup>g</sup> A/tern.Australia/G70C/75 (H11N9)

<sup>h</sup> Mutation in active site

<sup>i</sup> B/Beijing/1/87

<sup>j</sup> B/Lee/40

## References

- <sup>1</sup> von Itzstein, M.; Dyason, J. C.; Oliver, S. W.; White, H. F.; Wu, W. Y.; Kok, G. B.; Pegg, M. S. A study of the active site of influenza virus sialidase: an approach to the rational design of novel anti-influenza drugs. *J. Med. Chem.* **1996**, *39*, 388-391.
- <sup>2</sup> White, C. L.; Janakiraman, M. N.; Laver, W. G.; Philippon, C.; Vasella, A.; Air, G. M.; Luo, M. A sialic acid-derived phosphonate analog inhibits different strains of influenza virus neuraminidase with different efficiencies. *J. Mol. Biol.* **1995** *245*, 623-634.
- <sup>3</sup> White, C. L.; Janakiraman, M. N.; Laver, W. G.; Philippon, C.; Vasella, A.; Air, G. M.; Luo, M. A sialic acid-derived phosphonate analog inhibits different strains of influenza virus neuraminidase with different efficiencies. *J. Mol. Biol.* **1995** *245*, 623-634.
- <sup>4</sup> Taylor, N. R.; von Itzstein, M. Molecular Modeling Studies on Ligand Binding to Sialidase from Influenza Virus and the Mechanism of Catalysis. *J. Med. Chem.* **1994**, *37*, 616-624.
- <sup>5</sup> Stoll, V.; Stewart, K. D.; Maring, C. J.; Muchmore, S.; Giranda, V.; Gu, Y. G.; Wang, G.; Chen, Y.; Sun, M.; Zhao, C.; Kennedy, A. L.; Madigan, D. L.; Xu, Y.; Saldivar, A.; Kati, W.; Laver, G.; Sowin, T.;



- 
- Sham, H. L.; Greer, J.; Kempf, D. Influenza neuraminidase inhibitors: structure-based design of a novel inhibitor series. *Biochemistry* **2003**, *42*, 718-727.
- <sup>6</sup> Jedrzejewski, M. J.; Singh, S.; Brouillette, W. J.; Laver, W. G.; Air, G. M.; Luo, M. Structures of aromatic inhibitors of influenza virus neuraminidase. *Biochemistry* **1995**, *34*, 3144-3151.
- <sup>7</sup> Jedrzejewski, M. J.; Singh, S.; Brouillette, W. J.; Laver, W. G.; Air, G. M.; Luo, M. Structures of aromatic inhibitors of influenza virus neuraminidase. *Biochemistry* **1995**, *34*, 3144-3151.
- <sup>8</sup> Jedrzejewski, M. J.; Singh, S.; Brouillette, W. J.; Laver, W. G.; Air, G. M.; Luo, M. Structures of aromatic inhibitors of influenza virus neuraminidase. *Biochemistry* **1995**, *34*, 3144-3151.
- <sup>9</sup> Singh, S.; Jedrzejewski, M. J.; Air, G. M.; Luo, M.; Laver, W. G.; Brouillette, W. J. Structure-based inhibitors of influenza virus sialidase. A benzoic acid lead with novel interaction. *J. Med. Chem.* **1995**, *38*, 3217-3225.
- <sup>10</sup> Varghese, J. N.; Smith, P. W.; Sollis, S. L.; Blick, T. J.; Sahasrabudhe, A.; McKimm-Breschkin, J. L.; Colman, P. M. Drug design against a shifting target: a structural basis for resistance to inhibitors in a variant of influenza virus neuraminidase. *Structure* **1998**, *6*, 735-746.
- <sup>11</sup> Varghese, J. N.; Smith, P. W.; Sollis, S. L.; Blick, T. J.; Sahasrabudhe, A.; McKimm-Breschkin, J. L.; Colman, P. M. Drug design against a shifting target: a structural basis for resistance to inhibitors in a variant of influenza virus neuraminidase. *Structure* **1998**, *6*, 735-746.
- <sup>12</sup> White, C. L.; Janakiraman, M. N.; Laver, W. G.; Philippon, C.; Vasella, A.; Air, G. M.; Luo, M. A sialic acid-derived phosphonate analog inhibits different strains of influenza virus neuraminidase with different efficiencies. *J. Mol. Biol.* **1995**, *245*, 623-634.
- <sup>13</sup> Mann, M. C.; Islam, T.; Dyason, J. C.; Florio, P.; Trower, C. J.; Thomson, R. J.; von Itzstein, M. Unsaturated N-acetyl- D-glucosaminuronic acid glycosides as inhibitors of influenza virus sialidase. *Glycoconj. J.* **2006**, *23*, 127-133.
- <sup>14</sup> McKimm-Breschkin, J.L.; Sahasrabudhe, A.; Blick, T.J.; McDonald, M.; Colman, P. M.; Hart, G. J.; Bethell, R. C.; Varghese, J. N. Mutations in a conserved residue in the influenza virus neuraminidase active site decreases sensitivity to Neu5Ac2en-derived inhibitors. *J. Vir.* **1998**, *72*, 2456-2462.
- <sup>15</sup> McKimm-Breschkin, J.L.; Sahasrabudhe, A.; Blick, T.J.; McDonald, M.; Colman, P. M.; Hart, G. J.; Bethell, R. C.; Varghese, J. N. Mutations in a conserved residue in the influenza virus neuraminidase active site decreases sensitivity to Neu5Ac2en-derived inhibitors. *J. Vir.* **1998**, *72*, 2456-2462.
- <sup>16</sup> McKimm-Breschkin, J.L.; Sahasrabudhe, A.; Blick, T.J.; McDonald, M.; Colman, P. M.; Hart, G. J.; Bethell, R. C.; Varghese, J. N. Mutations in a conserved residue in the influenza virus neuraminidase active site decreases sensitivity to Neu5Ac2en-derived inhibitors. *J. Vir.* **1998**, *72*, 2456-2462.
- <sup>17</sup> Smith, B. J.; Colman, P. M.; von Itzstein, M.; Danyelec, B.; Varghese, J. N. Analysis of inhibitor binding in influenza virus neuraminidase. *Protein. Sci.* **2001**, *10*, 689-696.
- <sup>18</sup> Smith, P. W.; Sollis, S. L.; Howes, P. D.; Cherry, P. C.; Cobley, K. N.; Taylor, H.; Whittington, A. R.; Scicinski, J.; Bethell, R. C.; Taylor, N.; Skarzynski, T.; Cleasby, A.; Singh, O.; Wonacott, A.; Varghese, J.; Colman, P. Novel inhibitors of influenza sialidases related to GG167 structure-activity, crystallographic and Molecular dynamics studies with 4H-pyran-2-carboxylic acid 6-carboxamides. *Bioorg. Med. Chem. Lett.* **1996**, *6*, 2931-2936.
- <sup>19</sup> McKimm-Breschkin, J.L.; Sahasrabudhe, A.; Blick, T.J.; McDonald, M.; Colman, P. M.; Hart, G. J.; Bethell, R. C.; Varghese, J. N. Mutations in a conserved residue in the influenza virus neuraminidase active site decreases sensitivity to Neu5Ac2en-derived inhibitors. *J. Vir.* **1998**, *72*, 2456-2462.
- <sup>20</sup> Smith, B. J.; Colman, P. M.; von Itzstein, M.; Danyelec, B.; Varghese, J. N. Analysis of inhibitor binding in influenza virus neuraminidase. *Protein. Sci.* **2001**, *10*, 689-696.
- <sup>21</sup> Smith, B. J.; Colman, P. M.; von Itzstein, M.; Danyelec, B.; Varghese, J. N. Analysis of inhibitor binding in influenza virus neuraminidase. *Protein. Sci.* **2001**, *10*, 689-696.

- 
- <sup>22</sup> McKimm-Breschkin, J.L.; Sahasrabudhe, A.; Blick, T.J.; McDonald, M.; Colman, P. M.; Hart, G. J.; Bethell, R. C.; Varghese, J. N. Mutations in a conserved residue in the influenza virus neuraminidase active site decreases sensitivity to Neu5Ac2en-derived inhibitors. *J. Vir.* **1998**, *72*, 2456–2462.
- <sup>23</sup> Kati, W. M.; Montgomery, D.; Carrick, R.; Gubareva, L.; Maring, C.; McDaniel, K.; Steffy, K.; Molla, A.; Hayden, F.; Kempf, D.; Kohlbrenner, W. In vitro characterization of A-315675, a highly potent inhibitor of A and B strain influenza virus neuraminidases and influenza virus replication. *Antimicrob. Agents Chemother.* **2002**, *46*, 1014–1021.
- <sup>24</sup> McKimm-Breschkin, J.L.; Sahasrabudhe, A.; Blick, T.J.; McDonald, M.; Colman, P. M.; Hart, G. J.; Bethell, R. C.; Varghese, J. N. Mutations in a conserved residue in the influenza virus neuraminidase active site decreases sensitivity to Neu5Ac2en-derived inhibitors. *J. Vir.* **1998**, *72*, 2456–2462.
- <sup>25</sup> McKimm-Breschkin, J.L.; Sahasrabudhe, A.; Blick, T.J.; McDonald, M.; Colman, P. M.; Hart, G. J.; Bethell, R. C.; Varghese, J. N. Mutations in a conserved residue in the influenza virus neuraminidase active site decreases sensitivity to Neu5Ac2en-derived inhibitors. *J. Vir.* **1998**, *72*, 2456–2462.
- <sup>26</sup> McKimm-Breschkin, J.L.; Sahasrabudhe, A.; Blick, T.J.; McDonald, M.; Colman, P. M.; Hart, G. J.; Bethell, R. C.; Varghese, J. N. Mutations in a conserved residue in the influenza virus neuraminidase active site decreases sensitivity to Neu5Ac2en-derived inhibitors. *J. Vir.* **1998**, *72*, 2456–2462.
- <sup>27</sup> Varghese, J. N.; Smith, P. W.; Sollis, S. L.; Blick, T. J.; Sahasrabudhe, A.; McKimm-Breschkin, J. L.; Colman, P. M. Drug design against a shifting target: a structural basis for resistance to inhibitors in a variant of influenza virus neuraminidase. *Structure* **1998**, *6*, 735–746.
- <sup>28</sup> Varghese, J. N.; Smith, P. W.; Sollis, S. L.; Blick, T. J.; Sahasrabudhe, A.; McKimm-Breschkin, J. L.; Colman, P. M. Drug design against a shifting target: a structural basis for resistance to inhibitors in a variant of influenza virus neuraminidase. *Structure* **1998**, *6*, 735–746.
- <sup>29</sup> Yen, H. L.; Herlocher, L. M.; Hoffmann, E.; Matrosovich, M. N.; Monto, A. S.; Webster, R. G.; Govorkova, E. A. Neuraminidase inhibitor-resistant influenza viruses may differ substantially in fitness and transmissibility. *Antimicrob. Agents Chemother.* **2005**, *49*, 4075–4084.
- <sup>30</sup> Varghese, J. N.; Smith, P. W.; Sollis, S. L.; Blick, T. J.; Sahasrabudhe, A.; McKimm-Breschkin, J. L.; Colman, P. M. Drug design against a shifting target: a structural basis for resistance to inhibitors in a variant of influenza virus neuraminidase. *Structure* **1998**, *6*, 735–746.
- <sup>31</sup> Kati, W. M.; Montgomery, D.; Carrick, R.; Gubareva, L.; Maring, C.; McDaniel, K.; Steffy, K.; Molla, A.; Hayden, F.; Kempf, D.; Kohlbrenner, W. In vitro characterization of A-315675, a highly potent inhibitor of A and B strain influenza virus neuraminidases and influenza virus replication. *Antimicrob. Agents Chemother.* **2002**, *46*, 1014–1021.
- <sup>32</sup> Varghese, J. N.; Smith, P. W.; Sollis, S. L.; Blick, T. J.; Sahasrabudhe, A.; McKimm-Breschkin, J. L.; Colman, P. M. Drug design against a shifting target: a structural basis for resistance to inhibitors in a variant of influenza virus neuraminidase. *Structure* **1998**, *6*, 735–746.
- <sup>33</sup> Yen, H. L.; Herlocher, L. M.; Hoffmann, E.; Matrosovich, M. N.; Monto, A. S.; Webster, R. G.; Govorkova, E. A. Neuraminidase inhibitor-resistant influenza viruses may differ substantially in fitness and transmissibility. *Antimicrob. Agents Chemother.* **2005**, *49*, 4075–4084.
- <sup>34</sup> Kati, W. M.; Montgomery, D.; Carrick, R.; Gubareva, L.; Maring, C.; McDaniel, K.; Steffy, K.; Molla, A.; Hayden, F.; Kempf, D.; Kohlbrenner, W. In vitro characterization of A-315675, a highly potent inhibitor of A and B strain influenza virus neuraminidases and influenza virus replication. *Antimicrob. Agents Chemother.* **2002**, *46*, 1014–1021.
- <sup>35</sup> Maring, C. J.; Stoll, V. S.; Zhao, C.; Sun, M.; Krueger, A. C.; Stewart, K. D.; Madigan, D. L.; Kati, W. M.; Xu, Y.; Carrick, R. J.; Montgomery, D. A.; Kempf-Grote, A.; Marsh, K. C.; Molla, A.; Steffy, K. R.; Sham, H. L.; Laver, W. G.; Gu, Y. G.; Kempf, D. J.; Kohlbrenner, W. E. Structure-based characterization and optimization of novel hydrophobic binding interactions in a series of pyrrolidine influenza neuraminidase inhibitors. *J. Med. Chem.* **2005**, *48*, 3980–3990.

- 
- <sup>36</sup> Stoll, V.; Stewart, K. D.; Maring, C. J.; Muchmore, S.; Giranda, V.; Gu, Y. G.; Wang, G.; Chen, Y.; Sun, M.; Zhao, C.; Kennedy, A. L.; Madigan, D. L.; Xu, Y.; Saldivar, A.; Kati, W.; Laver, G.; Sowin, T.; Sham, H. L.; Greer, J.; Kempf, D. Influenza neuraminidase inhibitors: structure-based design of a novel inhibitor series. *Biochemistry* **2003**, *42*, 718-727.
- <sup>37</sup> Wang, G. T.; Wang, S.; Gentles, R.; Sowin, T.; Maring, C. J.; Kempf, D. J.; Kati, W. M.; Stoll, V.; Stewart, K. D.; Laver, G. Design, synthesis, and structural analysis of inhibitors of influenza neuraminidase containing a 2,3-disubstituted tetrahydrofuran-5-carboxylic acid core. *Bioorg. Med. Chem. Lett.* **2005**, *15*, 125-128.
- <sup>38</sup> Wang, G. T.; Wang, S.; Gentles, R.; Sowin, T.; Maring, C. J.; Kempf, D. J.; Kati, W. M.; Stoll, V.; Stewart, K. D.; Laver, G. Design, synthesis, and structural analysis of inhibitors of influenza neuraminidase containing a 2,3-disubstituted tetrahydrofuran-5-carboxylic acid core. *Bioorg. Med. Chem. Lett.* **2005**, *15*, 125-128.
- <sup>39</sup> Jedrzejewski, M. J.; Singh, S.; Brouillette, W. J.; Laver, W. G.; Air, G. M.; Luo, M. Structures of aromatic inhibitors of influenza virus neuraminidase. *Biochemistry* **1995**, *34*, 3144-3151.
- <sup>40</sup> Taylor, N. R.; Cleasby, A.; Singh, O.; Skarzynski, T.; Wonacott, A. J.; Smith, P. W.; Sollis, S. L.; Howes, P. D.; Cherry, P. C.; Bethell, R.; Colman, P.; Varghese, J. Dihydropyranocarboxamides related to zanamivir: a new series of inhibitors of influenza virus sialidases. 2. Crystallographic and molecular modeling study of complexes of 4-amino-4H-pyran-6-carboxamides and sialidase from influenza virus types A and B. *J. Med. Chem.* **1998**, *41*, 798-807.
- <sup>41</sup> White, C. L.; Janakiraman, M. N.; Laver, W. G.; Philippon, C.; Vasella, A.; Air, G. M.; Luo, M. A sialic acid-derived phosphonate analog inhibits different strains of influenza virus neuraminidase with different efficiencies. *J. Mol. Biol.* **1995**, *245*, 623-634.
- <sup>42</sup> Smith, P. W.; Sollis, S. L.; Howes, P. D.; Cherry, P. C.; Starkey, I. D.; Cobley, K. N.; Weston, H.; Scicinski, J.; Merritt, A.; Whittington, A.; Wyatt, P.; Taylor, N.; Green, D.; Bethell, R.; Madar, S.; Fenton, R. J.; Morley, P. J.; Pateman, T.; Beresford, A. Dihydropyranocarboxamides related to zanamivir: a new series of inhibitors of influenza virus sialidases. 1. Discovery, synthesis, biological activity, and structure-activity relationships of 4-guanidino- and 4-amino-4H-pyran-6-carboxamides. *J. Med. Chem.* **1998**, *41*, 787-797.
- <sup>43</sup> Jedrzejewski, M. J.; Singh, S.; Brouillette, W. J.; Laver, W. G.; Air, G. M.; Luo, M. Structures of aromatic inhibitors of influenza virus neuraminidase. *Biochemistry* **1995**, *34*, 3144-3151.
- <sup>44</sup> Finley, J. B.; Atigadda, V. R.; Duarte, F.; Zhao, J. J.; Brouillette, W. J.; Air, G. M.; Luo, M. Novel aromatic inhibitors of influenza virus neuraminidase make selective interactions with conserved residues and water molecules in the active site. *J. Mol. Biol.* **1999**, *293*, 1107-1119.
- <sup>45</sup> Atigadda, V. R.; Brouillette, W. J.; Duarte, F.; Babu, Y. S.; Bantia, S.; Chand, P.; Chu, N.; Montgomery, J. A.; Walsh, D. A.; Sudbeck, E.; Finley, J.; Air, G. M.; Luo, M.; Laver, G. W. Hydrophobic benzoic acids as inhibitors of influenza neuraminidase. *Bioorg. Med. Chem.* **1999**, *7*, 2487-2497.
- <sup>46</sup> Lommer, B. S.; Ali, S. M.; Bajpai, S. N.; Brouillette, W. J.; Air, G. M.; Luo, M. A benzoic acid inhibitor induces a novel conformational change in the active site of Influenza B virus neuraminidase. *Acta Crystallogr.* **2004**, *D60*, 1017-1023.
- <sup>47</sup> Lommer, B. S.; Ali, S. M.; Bajpai, S. N.; Brouillette, W. J.; Air, G. M.; Luo, M. A benzoic acid inhibitor induces a novel conformational change in the active site of Influenza B virus neuraminidase. *Acta Crystallogr.* **2004**, *D60*, 1017-1023.
- <sup>48</sup> Finley, J. B.; Atigadda, V. R.; Duarte, F.; Zhao, J. J.; Brouillette, W. J.; Air, G. M.; Luo, M. Novel aromatic inhibitors of influenza virus neuraminidase make selective interactions with conserved residues and water molecules in the active site. *J. Mol. Biol.* **1999**, *293*, 1107-1119.
- <sup>49</sup> Atigadda, V. R.; Brouillette, W. J.; Duarte, F.; Ali, S. M.; Babu, Y. S.; Bantia, S.; Chand, P.; Chu, N.; Montgomery, J. A.; Walsh, D. A.; Sudbeck, E. A.; Finley, J.; Luo, M.; Air, G. M.; Laver, G. W.

---

Potent inhibition of influenza sialidase by a benzoic acid containing a 2-pyrrolidinone substituent. *J. Med. Chem.* **1999**, *42*, 2332–2343.

- <sup>50</sup> Finley, J. B.; Atigadda, V. R.; Duarte, F.; Zhao, J. J.; Brouillette, W. J.; Air, G. M.; Luo, M. Novel aromatic inhibitors of influenza virus neuraminidase make selective interactions with conserved residues and water molecules in the active site. *J. Mol. Biol.* **1999**, *293*, 1107–1119.

## Tables S2-S3

Residues flipped by reduce

| No. | PDB Code | Residue Name | Residue Number |
|-----|----------|--------------|----------------|
| 1   | 2BAT     | ASN          | 104            |
| 1   | 2BAT     | ASN          | 142            |
| 1   | 2BAT     | ASN          | 161            |
| 1   | 2BAT     | ASN          | 334            |
| 1   | 2BAT     | ASN          | 356            |
| 1   | 2BAT     | ASN          | 387            |
| 1   | 2BAT     | ASN          | 393            |
| 1   | 2BAT     | ASN          | 419            |
| 1   | 2BAT     | GLN          | 131            |
| 1   | 2BAT     | GLN          | 226            |
| 1   | 2BAT     | HIS          | 168            |
| 1   | 2BAT     | HIS          | 274            |
| 2   | 1INW     | ASN          | 142            |
| 2   | 1INW     | ASN          | 334            |
| 2   | 1INW     | ASN          | 356            |
| 2   | 1INW     | ASN          | 358            |
| 2   | 1INW     | ASN          | 387            |
| 2   | 1INW     | ASN          | 393            |
| 2   | 1INW     | ASN          | 419            |
| 2   | 1INW     | GLN          | 131            |
| 2   | 1INW     | GLN          | 226            |
| 2   | 1INW     | HIS          | 155            |
| 2   | 1INW     | HIS          | 168            |
| 2   | 1INW     | HIS          | 184            |
| 2   | 1INW     | HIS          | 274            |
| 3   | 1INW     | ASN          | 142            |
| 3   | 1INW     | ASN          | 334            |
| 3   | 1INW     | ASN          | 356            |
| 3   | 1INW     | ASN          | 358            |
| 3   | 1INW     | ASN          | 387            |
| 3   | 1INW     | ASN          | 393            |
| 3   | 1INW     | ASN          | 419            |
| 3   | 1INW     | GLN          | 131            |
| 3   | 1INW     | GLN          | 226            |
| 3   | 1INW     | HIS          | 155            |
| 3   | 1INW     | HIS          | 168            |
| 3   | 1INW     | HIS          | 184            |
| 3   | 1INW     | HIS          | 274            |
| 4   | 1INX     | ASN          | 104            |
| 4   | 1INX     | ASN          | 142            |
| 4   | 1INX     | ASN          | 161            |
| 4   | 1INX     | ASN          | 334            |
| 4   | 1INX     | ASN          | 356            |
| 4   | 1INX     | ASN          | 387            |
| 4   | 1INX     | ASN          | 393            |
| 4   | 1INX     | ASN          | 419            |

|   |      |     |     |
|---|------|-----|-----|
| 4 | 1INX | GLN | 131 |
| 4 | 1INX | GLN | 226 |
| 4 | 1INX | HIS | 168 |
| 4 | 1INX | HIS | 184 |
| 4 | 1INX | HIS | 274 |
| 5 | 1INX | ASN | 104 |
| 5 | 1INX | ASN | 142 |
| 5 | 1INX | ASN | 161 |
| 5 | 1INX | ASN | 334 |
| 5 | 1INX | ASN | 356 |
| 5 | 1INX | ASN | 387 |
| 5 | 1INX | ASN | 393 |
| 5 | 1INX | ASN | 419 |
| 5 | 1INX | GLN | 131 |
| 5 | 1INX | GLN | 226 |
| 5 | 1INX | HIS | 168 |
| 5 | 1INX | HIS | 184 |
| 5 | 1INX | HIS | 274 |
| 6 | 1IVF | ASN | 104 |
| 6 | 1IVF | ASN | 142 |
| 6 | 1IVF | ASN | 161 |
| 6 | 1IVF | ASN | 334 |
| 6 | 1IVF | ASN | 356 |
| 6 | 1IVF | ASN | 358 |
| 6 | 1IVF | ASN | 387 |
| 6 | 1IVF | ASN | 393 |
| 6 | 1IVF | GLN | 136 |
| 6 | 1IVF | GLN | 220 |
| 6 | 1IVF | GLN | 226 |
| 6 | 1IVF | HIS | 168 |
| 6 | 1IVF | HIS | 184 |
| 6 | 1IVF | HIS | 274 |
| 7 | 1IVD | ASN | 104 |
| 7 | 1IVD | ASN | 161 |
| 7 | 1IVD | ASN | 334 |
| 7 | 1IVD | ASN | 387 |
| 7 | 1IVD | ASN | 393 |
| 7 | 1IVD | ASN | 402 |
| 7 | 1IVD | ASN | 419 |
| 7 | 1IVD | GLN | 131 |
| 7 | 1IVD | GLN | 173 |
| 7 | 1IVD | GLN | 226 |
| 7 | 1IVD | HIS | 150 |
| 8 | 1IVC | ASN | 104 |
| 8 | 1IVC | ASN | 142 |
| 8 | 1IVC | ASN | 334 |
| 8 | 1IVC | ASN | 387 |
| 8 | 1IVC | ASN | 393 |
| 8 | 1IVC | ASN | 402 |
| 8 | 1IVC | ASN | 419 |

|    |      |     |     |
|----|------|-----|-----|
| 8  | 1IVC | GLN | 131 |
| 8  | 1IVC | GLN | 226 |
| 8  | 1IVC | HIS | 155 |
| 8  | 1IVC | HIS | 184 |
| 8  | 1IVC | HIS | 274 |
| 9  | 1IVC | ASN | 104 |
| 9  | 1IVC | ASN | 142 |
| 9  | 1IVC | ASN | 334 |
| 9  | 1IVC | ASN | 387 |
| 9  | 1IVC | ASN | 393 |
| 9  | 1IVC | ASN | 402 |
| 9  | 1IVC | ASN | 419 |
| 9  | 1IVC | GLN | 131 |
| 9  | 1IVC | GLN | 226 |
| 9  | 1IVC | HIS | 155 |
| 9  | 1IVC | HIS | 184 |
| 9  | 1IVC | HIS | 274 |
| 10 | 1IVE | ASN | 142 |
| 10 | 1IVE | ASN | 161 |
| 10 | 1IVE | ASN | 221 |
| 10 | 1IVE | ASN | 387 |
| 10 | 1IVE | ASN | 402 |
| 10 | 1IVE | ASN | 419 |
| 10 | 1IVE | GLN | 131 |
| 10 | 1IVE | GLN | 220 |
| 10 | 1IVE | HIS | 168 |
| 10 | 1IVE | HIS | 184 |
| 10 | 1IVE | HIS | 274 |
| 11 | 1IVE | ASN | 142 |
| 11 | 1IVE | ASN | 161 |
| 11 | 1IVE | ASN | 221 |
| 11 | 1IVE | ASN | 387 |
| 11 | 1IVE | ASN | 402 |
| 11 | 1IVE | ASN | 419 |
| 11 | 1IVE | GLN | 131 |
| 11 | 1IVE | GLN | 220 |
| 11 | 1IVE | HIS | 168 |
| 11 | 1IVE | HIS | 184 |
| 11 | 1IVE | HIS | 274 |
| 12 | 1ING | ASN | 104 |
| 12 | 1ING | ASN | 161 |
| 12 | 1ING | ASN | 221 |
| 12 | 1ING | ASN | 334 |
| 12 | 1ING | ASN | 387 |
| 12 | 1ING | ASN | 465 |
| 12 | 1ING | GLN | 173 |
| 12 | 1ING | GLN | 220 |
| 12 | 1ING | GLN | 347 |
| 12 | 1ING | HIS | 144 |
| 12 | 1ING | HIS | 191 |

|    |      |     |     |
|----|------|-----|-----|
| 12 | 1ING | HIS | 264 |
| 12 | 1ING | HIS | 274 |
| 13 | 1ING | ASN | 104 |
| 13 | 1ING | ASN | 161 |
| 13 | 1ING | ASN | 221 |
| 13 | 1ING | ASN | 334 |
| 13 | 1ING | ASN | 387 |
| 13 | 1ING | ASN | 402 |
| 13 | 1ING | ASN | 402 |
| 13 | 1ING | ASN | 465 |
| 13 | 1ING | GLN | 173 |
| 13 | 1ING | GLN | 220 |
| 13 | 1ING | GLN | 347 |
| 13 | 1ING | HIS | 184 |
| 13 | 1ING | HIS | 191 |
| 13 | 1ING | HIS | 264 |
| 13 | 1ING | HIS | 274 |
| 14 | 1INH | ASN | 104 |
| 14 | 1INH | ASN | 142 |
| 14 | 1INH | ASN | 387 |
| 14 | 1INH | ASN | 393 |
| 14 | 1INH | ASN | 402 |
| 14 | 1INH | ASN | 419 |
| 14 | 1INH | GLN | 131 |
| 14 | 1INH | GLN | 226 |
| 14 | 1INH | HIS | 144 |
| 14 | 1INH | HIS | 274 |
| 15 | 1INH | ASN | 104 |
| 15 | 1INH | ASN | 387 |
| 15 | 1INH | ASN | 393 |
| 15 | 1INH | ASN | 419 |
| 15 | 1INH | ASN | 465 |
| 15 | 1INH | ASN | 465 |
| 15 | 1INH | GLN | 131 |
| 15 | 1INH | GLN | 226 |
| 15 | 1INH | HIS | 274 |
| 16 | 1W1X | ASN | 92  |
| 16 | 1W1X | ASN | 152 |
| 16 | 1W1X | ASN | 340 |
| 16 | 1W1X | ASN | 342 |
| 16 | 1W1X | ASN | 400 |
| 16 | 1W1X | ASN | 406 |
| 16 | 1W1X | ASN | 408 |
| 16 | 1W1X | ASN | 422 |
| 16 | 1W1X | ASN | 427 |
| 16 | 1W1X | ASN | 449 |
| 16 | 1W1X | GLN | 233 |
| 16 | 1W1X | HIS | 119 |
| 16 | 1W1X | HIS | 150 |
| 16 | 1W1X | HIS | 240 |



|    |      |     |      |
|----|------|-----|------|
| 16 | 1W1X | HIS | 281  |
| 16 | 1W1X | HIS | 467  |
| 17 | 1W1X | ASN | 1152 |
| 17 | 1W1X | ASN | 1207 |
| 17 | 1W1X | ASN | 1340 |
| 17 | 1W1X | ASN | 1342 |
| 17 | 1W1X | ASN | 1400 |
| 17 | 1W1X | ASN | 1405 |
| 17 | 1W1X | ASN | 1406 |
| 17 | 1W1X | ASN | 1408 |
| 17 | 1W1X | ASN | 1427 |
| 17 | 1W1X | ASN | 1449 |
| 17 | 1W1X | GLN | 1142 |
| 17 | 1W1X | GLN | 1233 |
| 17 | 1W1X | HIS | 1119 |
| 17 | 1W1X | HIS | 1240 |
| 17 | 1W1X | HIS | 1281 |
| 17 | 1W1X | HIS | 1467 |
| 18 | 1W1X | ASN | 2152 |
| 18 | 1W1X | ASN | 2207 |
| 18 | 1W1X | ASN | 2340 |
| 18 | 1W1X | ASN | 2406 |
| 18 | 1W1X | ASN | 2408 |
| 18 | 1W1X | ASN | 2422 |
| 18 | 1W1X | ASN | 2449 |
| 18 | 1W1X | GLN | 2233 |
| 18 | 1W1X | HIS | 2119 |
| 18 | 1W1X | HIS | 2150 |
| 18 | 1W1X | HIS | 2240 |
| 18 | 1W1X | HIS | 2281 |
| 18 | 1W1X | HIS | 2467 |
| 19 | 1W1X | ASN | 3152 |
| 19 | 1W1X | ASN | 3340 |
| 19 | 1W1X | ASN | 3342 |
| 19 | 1W1X | ASN | 3400 |
| 19 | 1W1X | ASN | 3406 |
| 19 | 1W1X | ASN | 3422 |
| 19 | 1W1X | ASN | 3427 |
| 19 | 1W1X | ASN | 3449 |
| 19 | 1W1X | GLN | 3233 |
| 19 | 1W1X | HIS | 3119 |
| 19 | 1W1X | HIS | 3150 |
| 19 | 1W1X | HIS | 3240 |
| 19 | 1W1X | HIS | 3281 |
| 20 | 1W20 | ASN | 92   |
| 20 | 1W20 | ASN | 152  |
| 20 | 1W20 | ASN | 340  |
| 20 | 1W20 | ASN | 342  |
| 20 | 1W20 | ASN | 406  |
| 20 | 1W20 | ASN | 408  |

|    |      |     |      |
|----|------|-----|------|
| 20 | 1W20 | ASN | 422  |
| 20 | 1W20 | ASN | 427  |
| 20 | 1W20 | ASN | 449  |
| 20 | 1W20 | GLN | 233  |
| 20 | 1W20 | HIS | 150  |
| 20 | 1W20 | HIS | 240  |
| 20 | 1W20 | HIS | 281  |
| 20 | 1W20 | HIS | 467  |
| 21 | 1W20 | ASN | 1152 |
| 21 | 1W20 | ASN | 1207 |
| 21 | 1W20 | ASN | 1340 |
| 21 | 1W20 | ASN | 1342 |
| 21 | 1W20 | ASN | 1400 |
| 21 | 1W20 | ASN | 1405 |
| 21 | 1W20 | ASN | 1406 |
| 21 | 1W20 | ASN | 1408 |
| 21 | 1W20 | ASN | 1422 |
| 21 | 1W20 | ASN | 1427 |
| 21 | 1W20 | ASN | 1449 |
| 21 | 1W20 | GLN | 1142 |
| 21 | 1W20 | GLN | 1233 |
| 21 | 1W20 | HIS | 1240 |
| 21 | 1W20 | HIS | 1281 |
| 21 | 1W20 | HIS | 1467 |
| 22 | 1W20 | ASN | 2152 |
| 22 | 1W20 | ASN | 2207 |
| 22 | 1W20 | ASN | 2340 |
| 22 | 1W20 | ASN | 2406 |
| 22 | 1W20 | ASN | 2408 |
| 22 | 1W20 | ASN | 2422 |
| 22 | 1W20 | ASN | 2427 |
| 22 | 1W20 | ASN | 2449 |
| 22 | 1W20 | GLN | 2233 |
| 22 | 1W20 | HIS | 2150 |
| 22 | 1W20 | HIS | 2240 |
| 22 | 1W20 | HIS | 2281 |
| 22 | 1W20 | HIS | 2467 |
| 23 | 1W20 | ASN | 3152 |
| 23 | 1W20 | ASN | 3207 |
| 23 | 1W20 | ASN | 3340 |
| 23 | 1W20 | ASN | 3342 |
| 23 | 1W20 | ASN | 3406 |
| 23 | 1W20 | ASN | 3422 |
| 23 | 1W20 | ASN | 3427 |
| 23 | 1W20 | ASN | 3449 |
| 23 | 1W20 | GLN | 3233 |
| 23 | 1W20 | HIS | 3150 |
| 23 | 1W20 | HIS | 3240 |
| 23 | 1W20 | HIS | 3281 |
| 24 | 1W21 | ASN | 92   |

|    |      |     |      |
|----|------|-----|------|
| 24 | 1W21 | ASN | 152  |
| 24 | 1W21 | ASN | 340  |
| 24 | 1W21 | ASN | 342  |
| 24 | 1W21 | ASN | 406  |
| 24 | 1W21 | ASN | 408  |
| 24 | 1W21 | ASN | 422  |
| 24 | 1W21 | ASN | 427  |
| 24 | 1W21 | ASN | 449  |
| 24 | 1W21 | GLN | 233  |
| 24 | 1W21 | HIS | 150  |
| 24 | 1W21 | HIS | 240  |
| 24 | 1W21 | HIS | 281  |
| 24 | 1W21 | HIS | 467  |
| 25 | 1W21 | ASN | 1152 |
| 25 | 1W21 | ASN | 1207 |
| 25 | 1W21 | ASN | 1340 |
| 25 | 1W21 | ASN | 1342 |
| 25 | 1W21 | ASN | 1400 |
| 25 | 1W21 | ASN | 1405 |
| 25 | 1W21 | ASN | 1406 |
| 25 | 1W21 | ASN | 1408 |
| 25 | 1W21 | ASN | 1422 |
| 25 | 1W21 | ASN | 1427 |
| 25 | 1W21 | ASN | 1449 |
| 25 | 1W21 | GLN | 1142 |
| 25 | 1W21 | GLN | 1233 |
| 25 | 1W21 | HIS | 1240 |
| 25 | 1W21 | HIS | 1281 |
| 25 | 1W21 | HIS | 1467 |
| 26 | 1W21 | ASN | 2152 |
| 26 | 1W21 | ASN | 2207 |
| 26 | 1W21 | ASN | 2340 |
| 26 | 1W21 | ASN | 2406 |
| 26 | 1W21 | ASN | 2408 |
| 26 | 1W21 | ASN | 2422 |
| 26 | 1W21 | ASN | 2427 |
| 26 | 1W21 | ASN | 2449 |
| 26 | 1W21 | GLN | 2233 |
| 26 | 1W21 | HIS | 2150 |
| 26 | 1W21 | HIS | 2240 |
| 26 | 1W21 | HIS | 2281 |
| 26 | 1W21 | HIS | 2467 |
| 27 | 1W21 | ASN | 3152 |
| 27 | 1W21 | ASN | 3207 |
| 27 | 1W21 | ASN | 3340 |
| 27 | 1W21 | ASN | 3342 |
| 27 | 1W21 | ASN | 3406 |
| 27 | 1W21 | ASN | 3422 |
| 27 | 1W21 | ASN | 3427 |
| 27 | 1W21 | ASN | 3449 |

|    |      |     |      |
|----|------|-----|------|
| 27 | 1W21 | GLN | 3233 |
| 27 | 1W21 | HIS | 3150 |
| 27 | 1W21 | HIS | 3240 |
| 27 | 1W21 | HIS | 3281 |
| 28 | 1MVE | ASN | 95   |
| 28 | 1MVE | ASN | 170  |
| 28 | 1MVE | ASN | 216  |
| 28 | 1MVE | ASN | 221  |
| 28 | 1MVE | ASN | 294  |
| 28 | 1MVE | ASN | 338  |
| 28 | 1MVE | ASN | 344  |
| 28 | 1MVE | ASN | 346  |
| 28 | 1MVE | ASN | 400  |
| 28 | 1MVE | GLN | 392  |
| 28 | 1MVE | GLN | 395  |
| 28 | 1MVE | HIS | 98   |
| 28 | 1MVE | HIS | 144  |
| 28 | 1MVE | HIS | 233  |
| 29 | 2QWB | ASN | 95   |
| 29 | 2QWB | ASN | 170  |
| 29 | 2QWB | ASN | 221  |
| 29 | 2QWB | ASN | 344  |
| 29 | 2QWB | ASN | 346  |
| 29 | 2QWB | ASN | 400  |
| 29 | 2QWB | GLN | 392  |
| 29 | 2QWB | GLN | 395  |
| 29 | 2QWB | HIS | 98   |
| 29 | 2QWB | HIS | 144  |
| 29 | 2QWB | HIS | 233  |
| 29 | 2QWB | HIS | 274  |
| 30 | 1INY | ASN | 95   |
| 30 | 1INY | ASN | 171  |
| 30 | 1INY | ASN | 200  |
| 30 | 1INY | ASN | 201  |
| 30 | 1INY | ASN | 217  |
| 30 | 1INY | ASN | 222  |
| 30 | 1INY | ASN | 295  |
| 30 | 1INY | ASN | 330  |
| 30 | 1INY | ASN | 346  |
| 30 | 1INY | ASN | 399  |
| 30 | 1INY | GLN | 394  |
| 30 | 1INY | HIS | 98   |
| 30 | 1INY | HIS | 234  |
| 31 | 1INY | ASN | 95   |
| 31 | 1INY | ASN | 171  |
| 31 | 1INY | ASN | 200  |
| 31 | 1INY | ASN | 201  |
| 31 | 1INY | ASN | 217  |
| 31 | 1INY | ASN | 222  |
| 31 | 1INY | ASN | 295  |

|    |       |     |     |
|----|-------|-----|-----|
| 31 | 1IN Y | ASN | 330 |
| 31 | 1IN Y | ASN | 346 |
| 31 | 1IN Y | ASN | 399 |
| 31 | 1IN Y | GLN | 394 |
| 31 | 1IN Y | HIS | 98  |
| 31 | 1IN Y | HIS | 234 |
| 32 | 1F8B  | ASN | 95  |
| 32 | 1F8B  | ASN | 170 |
| 32 | 1F8B  | ASN | 216 |
| 32 | 1F8B  | ASN | 221 |
| 32 | 1F8B  | ASN | 294 |
| 32 | 1F8B  | ASN | 344 |
| 32 | 1F8B  | ASN | 346 |
| 32 | 1F8B  | ASN | 400 |
| 32 | 1F8B  | GLN | 392 |
| 32 | 1F8B  | GLN | 395 |
| 32 | 1F8B  | HIS | 98  |
| 32 | 1F8B  | HIS | 144 |
| 32 | 1F8B  | HIS | 233 |
| 33 | 1NNB  | ASN | 147 |
| 33 | 1NNB  | ASN | 200 |
| 33 | 1NNB  | ASN | 345 |
| 33 | 1NNB  | ASN | 348 |
| 33 | 1NNB  | ASN | 443 |
| 33 | 1NNB  | GLN | 137 |
| 33 | 1NNB  | GLN | 457 |
| 33 | 1NNB  | HIS | 99  |
| 33 | 1NNB  | HIS | 314 |
| 34 | 2QWC  | ASN | 95  |
| 34 | 2QWC  | ASN | 170 |
| 34 | 2QWC  | ASN | 216 |
| 34 | 2QWC  | ASN | 221 |
| 34 | 2QWC  | ASN | 338 |
| 34 | 2QWC  | ASN | 344 |
| 34 | 2QWC  | ASN | 346 |
| 34 | 2QWC  | ASN | 400 |
| 34 | 2QWC  | GLN | 392 |
| 34 | 2QWC  | GLN | 395 |
| 34 | 2QWC  | HIS | 98  |
| 34 | 2QWC  | HIS | 144 |
| 34 | 2QWC  | HIS | 233 |
| 34 | 2QWC  | HIS | 274 |
| 35 | 1F8C  | ASN | 95  |
| 35 | 1F8C  | ASN | 170 |
| 35 | 1F8C  | ASN | 216 |
| 35 | 1F8C  | ASN | 221 |
| 35 | 1F8C  | ASN | 294 |
| 35 | 1F8C  | ASN | 346 |
| 35 | 1F8C  | ASN | 400 |
| 35 | 1F8C  | GLN | 392 |

|    |      |     |     |
|----|------|-----|-----|
| 35 | 1F8C | GLN | 395 |
| 35 | 1F8C | HIS | 98  |
| 35 | 1F8C | HIS | 144 |
| 35 | 1F8C | HIS | 233 |
| 36 | 2QWD | ASN | 95  |
| 36 | 2QWD | ASN | 170 |
| 36 | 2QWD | ASN | 216 |
| 36 | 2QWD | ASN | 221 |
| 36 | 2QWD | ASN | 344 |
| 36 | 2QWD | ASN | 346 |
| 36 | 2QWD | ASN | 400 |
| 36 | 2QWD | GLN | 392 |
| 36 | 2QWD | GLN | 395 |
| 36 | 2QWD | HIS | 98  |
| 36 | 2QWD | HIS | 144 |
| 36 | 2QWD | HIS | 233 |
| 36 | 2QWD | HIS | 274 |
| 37 | 1F8D | ASN | 95  |
| 37 | 1F8D | ASN | 170 |
| 37 | 1F8D | ASN | 216 |
| 37 | 1F8D | ASN | 221 |
| 37 | 1F8D | ASN | 294 |
| 37 | 1F8D | ASN | 338 |
| 37 | 1F8D | ASN | 344 |
| 37 | 1F8D | ASN | 346 |
| 37 | 1F8D | ASN | 400 |
| 37 | 1F8D | GLN | 392 |
| 37 | 1F8D | GLN | 395 |
| 37 | 1F8D | HIS | 98  |
| 37 | 1F8D | HIS | 144 |
| 37 | 1F8D | HIS | 233 |
| 38 | 1F8E | ASN | 95  |
| 38 | 1F8E | ASN | 170 |
| 38 | 1F8E | ASN | 216 |
| 38 | 1F8E | ASN | 221 |
| 38 | 1F8E | ASN | 294 |
| 38 | 1F8E | ASN | 344 |
| 38 | 1F8E | ASN | 346 |
| 38 | 1F8E | ASN | 400 |
| 38 | 1F8E | GLN | 392 |
| 38 | 1F8E | GLN | 395 |
| 38 | 1F8E | HIS | 98  |
| 38 | 1F8E | HIS | 144 |
| 38 | 1F8E | HIS | 233 |
| 39 | 1NNC | ASN | 95  |
| 39 | 1NNC | ASN | 170 |
| 39 | 1NNC | ASN | 216 |
| 39 | 1NNC | ASN | 221 |
| 39 | 1NNC | ASN | 294 |
| 39 | 1NNC | ASN | 346 |

|    |      |     |     |
|----|------|-----|-----|
| 39 | 1NNC | ASN | 400 |
| 39 | 1NNC | GLN | 392 |
| 39 | 1NNC | GLN | 395 |
| 39 | 1NNC | HIS | 98  |
| 39 | 1NNC | HIS | 144 |
| 39 | 1NNC | HIS | 233 |
| 40 | 2QWE | ASN | 95  |
| 40 | 2QWE | ASN | 170 |
| 40 | 2QWE | ASN | 221 |
| 40 | 2QWE | ASN | 344 |
| 40 | 2QWE | ASN | 346 |
| 40 | 2QWE | ASN | 400 |
| 40 | 2QWE | GLN | 392 |
| 40 | 2QWE | GLN | 395 |
| 40 | 2QWE | HIS | 98  |
| 40 | 2QWE | HIS | 144 |
| 40 | 2QWE | HIS | 233 |
| 40 | 2QWE | HIS | 274 |
| 41 | 1BJI | ASN | 95  |
| 41 | 1BJI | ASN | 170 |
| 41 | 1BJI | ASN | 216 |
| 41 | 1BJI | ASN | 221 |
| 41 | 1BJI | ASN | 294 |
| 41 | 1BJI | ASN | 346 |
| 41 | 1BJI | ASN | 400 |
| 41 | 1BJI | GLN | 392 |
| 41 | 1BJI | GLN | 395 |
| 41 | 1BJI | HIS | 98  |
| 41 | 1BJI | HIS | 144 |
| 41 | 1BJI | HIS | 233 |
| 41 | 1BJI | HIS | 274 |
| 42 | 2QWF | ASN | 95  |
| 42 | 2QWF | ASN | 170 |
| 42 | 2QWF | ASN | 216 |
| 42 | 2QWF | ASN | 221 |
| 42 | 2QWF | ASN | 346 |
| 42 | 2QWF | ASN | 400 |
| 42 | 2QWF | GLN | 392 |
| 42 | 2QWF | GLN | 395 |
| 42 | 2QWF | HIS | 98  |
| 42 | 2QWF | HIS | 144 |
| 42 | 2QWF | HIS | 233 |
| 43 | 2QWI | ASN | 95  |
| 43 | 2QWI | ASN | 170 |
| 43 | 2QWI | ASN | 216 |
| 43 | 2QWI | ASN | 338 |
| 43 | 2QWI | ASN | 346 |
| 43 | 2QWI | ASN | 400 |
| 43 | 2QWI | GLN | 392 |
| 43 | 2QWI | GLN | 395 |

|    |      |     |     |
|----|------|-----|-----|
| 43 | 2QWI | HIS | 98  |
| 43 | 2QWI | HIS | 144 |
| 43 | 2QWI | HIS | 233 |
| 44 | 2QWG | ASN | 95  |
| 44 | 2QWG | ASN | 170 |
| 44 | 2QWG | ASN | 221 |
| 44 | 2QWG | ASN | 346 |
| 44 | 2QWG | ASN | 400 |
| 44 | 2QWG | GLN | 392 |
| 44 | 2QWG | GLN | 395 |
| 44 | 2QWG | HIS | 98  |
| 44 | 2QWG | HIS | 144 |
| 44 | 2QWG | HIS | 233 |
| 45 | 2QWJ | ASN | 95  |
| 45 | 2QWJ | ASN | 170 |
| 45 | 2QWJ | ASN | 221 |
| 45 | 2QWJ | ASN | 294 |
| 45 | 2QWJ | ASN | 346 |
| 45 | 2QWJ | ASN | 400 |
| 45 | 2QWJ | GLN | 392 |
| 45 | 2QWJ | GLN | 395 |
| 45 | 2QWJ | HIS | 98  |
| 45 | 2QWJ | HIS | 144 |
| 45 | 2QWJ | HIS | 233 |
| 45 | 2QWJ | HIS | 274 |
| 46 | 2QWH | ASN | 95  |
| 46 | 2QWH | ASN | 170 |
| 46 | 2QWH | ASN | 216 |
| 46 | 2QWH | ASN | 221 |
| 46 | 2QWH | ASN | 346 |
| 46 | 2QWH | ASN | 400 |
| 46 | 2QWH | GLN | 392 |
| 46 | 2QWH | GLN | 395 |
| 46 | 2QWH | HIS | 98  |
| 46 | 2QWH | HIS | 144 |
| 46 | 2QWH | HIS | 233 |
| 46 | 2QWH | HIS | 274 |
| 47 | 2QWK | ASN | 95  |
| 47 | 2QWK | ASN | 170 |
| 47 | 2QWK | ASN | 216 |
| 47 | 2QWK | ASN | 221 |
| 47 | 2QWK | ASN | 344 |
| 47 | 2QWK | ASN | 346 |
| 47 | 2QWK | ASN | 400 |
| 47 | 2QWK | GLN | 392 |
| 47 | 2QWK | GLN | 395 |
| 47 | 2QWK | HIS | 98  |
| 47 | 2QWK | HIS | 144 |
| 47 | 2QWK | HIS | 233 |
| 48 | 1L7F | ASN | 95  |



|    |      |     |     |
|----|------|-----|-----|
| 48 | 1L7F | ASN | 170 |
| 48 | 1L7F | ASN | 216 |
| 48 | 1L7F | ASN | 221 |
| 48 | 1L7F | ASN | 294 |
| 48 | 1L7F | ASN | 338 |
| 48 | 1L7F | ASN | 346 |
| 48 | 1L7F | ASN | 400 |
| 48 | 1L7F | GLN | 392 |
| 48 | 1L7F | GLN | 395 |
| 48 | 1L7F | HIS | 98  |
| 48 | 1L7F | HIS | 233 |
| 48 | 1L7F | HIS | 274 |
| 49 | 1L7G | ASN | 95  |
| 49 | 1L7G | ASN | 170 |
| 49 | 1L7G | ASN | 216 |
| 49 | 1L7G | ASN | 221 |
| 49 | 1L7G | ASN | 294 |
| 49 | 1L7G | ASN | 346 |
| 49 | 1L7G | ASN | 400 |
| 49 | 1L7G | GLN | 392 |
| 49 | 1L7G | GLN | 395 |
| 49 | 1L7G | HIS | 98  |
| 49 | 1L7G | HIS | 233 |
| 49 | 1L7G | HIS | 274 |
| 50 | 1L7H | ASN | 95  |
| 50 | 1L7H | ASN | 170 |
| 50 | 1L7H | ASN | 216 |
| 50 | 1L7H | ASN | 221 |
| 50 | 1L7H | ASN | 338 |
| 50 | 1L7H | ASN | 346 |
| 50 | 1L7H | ASN | 400 |
| 50 | 1L7H | GLN | 392 |
| 50 | 1L7H | GLN | 395 |
| 50 | 1L7H | HIS | 233 |
| 50 | 1L7H | HIS | 274 |
| 51 | 1XOE | ASN | 172 |
| 51 | 1XOE | ASN | 210 |
| 51 | 1XOE | ASN | 331 |
| 51 | 1XOE | ASN | 346 |
| 51 | 1XOE | ASN | 348 |
| 51 | 1XOE | ASN | 443 |
| 51 | 1XOE | GLN | 137 |
| 51 | 1XOE | HIS | 99  |
| 51 | 1XOE | HIS | 314 |
| 52 | 1XOG | ASN | 172 |
| 52 | 1XOG | ASN | 201 |
| 52 | 1XOG | ASN | 210 |
| 52 | 1XOG | ASN | 339 |
| 52 | 1XOG | ASN | 346 |
| 52 | 1XOG | ASN | 348 |

|    |      |     |     |
|----|------|-----|-----|
| 52 | 1XOG | ASN | 443 |
| 52 | 1XOG | GLN | 137 |
| 52 | 1XOG | GLN | 457 |
| 52 | 1XOG | HIS | 99  |
| 52 | 1XOG | HIS | 314 |
| 53 | 1NSC | ASN | 168 |
| 53 | 1NSC | ASN | 339 |
| 53 | 1NSC | GLN | 87  |
| 53 | 1NSC | HIS | 133 |
| 54 | 1NSC | ASN | 108 |
| 54 | 1NSC | ASN | 168 |
| 54 | 1NSC | HIS | 133 |
| 55 | 1INV | ASN | 144 |
| 55 | 1INV | ASN | 169 |
| 55 | 1INV | ASN | 340 |
| 55 | 1INV | GLN | 93  |
| 55 | 1INV | GLN | 453 |
| 55 | 1INV | HIS | 134 |
| 55 | 1INV | HIS | 215 |
| 56 | 1INV | ASN | 144 |
| 56 | 1INV | ASN | 169 |
| 56 | 1INV | ASN | 340 |
| 56 | 1INV | GLN | 93  |
| 56 | 1INV | GLN | 453 |
| 56 | 1INV | HIS | 134 |
| 56 | 1INV | HIS | 215 |
| 57 | 1NSD | ASN | 168 |
| 57 | 1NSD | ASN | 339 |
| 57 | 1NSD | GLN | 87  |
| 57 | 1NSD | HIS | 133 |
| 58 | 1NSD | ASN | 108 |
| 58 | 1NSD | ASN | 168 |
| 58 | 1NSD | HIS | 133 |
| 59 | 1A4G | ASN | 168 |
| 59 | 1A4G | ASN | 229 |
| 59 | 1A4G | ASN | 339 |
| 59 | 1A4G | GLN | 92  |
| 59 | 1A4G | HIS | 133 |
| 60 | 1A4G | ASN | 108 |
| 60 | 1A4G | ASN | 143 |
| 60 | 1A4G | ASN | 168 |
| 60 | 1A4G | ASN | 229 |
| 60 | 1A4G | HIS | 133 |
| 61 | 1A4Q | ASN | 168 |
| 61 | 1A4Q | ASN | 339 |
| 61 | 1A4Q | GLN | 92  |
| 61 | 1A4Q | HIS | 133 |
| 62 | 1A4Q | ASN | 108 |
| 62 | 1A4Q | ASN | 143 |
| 62 | 1A4Q | ASN | 168 |

|    |      |     |     |
|----|------|-----|-----|
| 62 | 1A4Q | ASN | 229 |
| 62 | 1A4Q | HIS | 133 |
| 63 | 1IVB | ASN | 169 |
| 63 | 1IVB | ASN | 220 |
| 63 | 1IVB | ASN | 294 |
| 63 | 1IVB | ASN | 340 |
| 63 | 1IVB | GLN | 93  |
| 63 | 1IVB | GLN | 453 |
| 63 | 1IVB | HIS | 134 |
| 63 | 1IVB | HIS | 439 |
| 64 | 1INF | ASN | 144 |
| 64 | 1INF | ASN | 169 |
| 64 | 1INF | ASN | 220 |
| 64 | 1INF | ASN | 230 |
| 64 | 1INF | ASN | 340 |
| 64 | 1INF | GLN | 93  |
| 64 | 1INF | HIS | 215 |
| 65 | 1B9S | ASN | 169 |
| 65 | 1B9S | ASN | 284 |
| 65 | 1B9S | ASN | 340 |
| 65 | 1B9S | GLN | 93  |
| 65 | 1B9S | HIS | 134 |
| 66 | 1VCJ | ASN | 144 |
| 66 | 1VCJ | ASN | 169 |
| 66 | 1VCJ | ASN | 340 |
| 66 | 1VCJ | GLN | 88  |
| 66 | 1VCJ | GLN | 93  |
| 66 | 1VCJ | HIS | 134 |
| 67 | 1VCJ | ASN | 144 |
| 67 | 1VCJ | ASN | 169 |
| 67 | 1VCJ | ASN | 340 |
| 67 | 1VCJ | GLN | 88  |
| 67 | 1VCJ | GLN | 93  |
| 67 | 1VCJ | HIS | 134 |
| 68 | 1B9V | ASN | 144 |
| 68 | 1B9V | ASN | 169 |
| 68 | 1B9V | ASN | 230 |
| 68 | 1B9V | ASN | 340 |
| 68 | 1B9V | ASN | 373 |
| 68 | 1B9V | GLN | 93  |
| 69 | 1B9V | ASN | 144 |
| 69 | 1B9V | ASN | 169 |
| 69 | 1B9V | ASN | 230 |
| 69 | 1B9V | ASN | 340 |
| 69 | 1B9V | ASN | 373 |
| 69 | 1B9V | GLN | 93  |
| 70 | 1B9T | ASN | 144 |
| 70 | 1B9T | ASN | 169 |
| 70 | 1B9T | ASN | 198 |
| 70 | 1B9T | ASN | 230 |

|    |      |     |     |
|----|------|-----|-----|
| 70 | 1B9T | ASN | 340 |
| 70 | 1B9T | GLN | 88  |
| 70 | 1B9T | GLN | 93  |
| 70 | 1B9T | HIS | 134 |

Protonation sites for histidine residues  
PDB

| No. | Code | list of hydrogens attached to side-chain nitrogens, first, hydrogen name then after underscore, r |         |         |         |         |         |         |         |
|-----|------|---------------------------------------------------------------------------------------------------|---------|---------|---------|---------|---------|---------|---------|
| 1   | 2BAT | HD1_144                                                                                           | HD1_150 | HE2_155 | HD1_168 | HE2_184 | HE2_191 | HE2_264 | HE2_274 |
| 2   | 1INW | HD1_144                                                                                           | HE2_144 | HE2_150 | HE2_155 | HD1_168 | HE2_184 | HE2_191 | HE2_264 |
| 3   | 1INW | HD1_144                                                                                           | HE2_144 | HE2_150 | HE2_155 | HD1_168 | HE2_184 | HE2_191 | HE2_264 |
| 4   | 1INX | HD1_144                                                                                           | HE2_150 | HE2_155 | HD1_168 | HE2_184 | HE2_191 | HE2_264 | HE2_274 |
| 5   | 1INX | HD1_144                                                                                           | HE2_150 | HE2_155 | HD1_168 | HE2_184 | HE2_191 | HE2_264 | HE2_274 |
| 6   | 1IVF | HE2_144                                                                                           | HE2_150 | HE2_155 | HD1_168 | HE2_184 | HE2_191 | HE2_264 | HE2_274 |
| 7   | 1IVD | HE2_144                                                                                           | HD1_150 | HE2_155 | HD1_168 | HE2_184 | HD1_191 | HE2_264 | HE2_274 |
| 8   | 1IVC | HE2_144                                                                                           | HE2_150 | HE2_155 | HE2_168 | HE2_184 | HE2_191 | HE2_264 | HE2_274 |
| 9   | 1IVC | HE2_144                                                                                           | HE2_150 | HE2_155 | HE2_168 | HE2_184 | HE2_191 | HE2_264 | HE2_274 |
| 10  | 1IVE | HE2_144                                                                                           | HE2_150 | HE2_155 | HD1_168 | HE2_184 | HE2_191 | HE2_264 | HE2_274 |
| 11  | 1IVE | HE2_144                                                                                           | HE2_150 | HE2_155 | HD1_168 | HE2_184 | HE2_191 | HE2_264 | HE2_274 |
| 12  | 1ING | HE2_144                                                                                           | HE2_150 | HE2_155 | HE2_168 | HE2_184 | HE2_191 | HE2_264 | HE2_274 |
| 13  | 1ING | HE2_144                                                                                           | HE2_150 | HE2_155 | HE2_168 | HE2_184 | HE2_191 | HE2_264 | HE2_274 |
| 14  | 1INH | HE2_144                                                                                           | HE2_150 | HE2_155 | HE2_168 | HE2_184 | HE2_191 | HE2_264 | HE2_274 |
| 15  | 1INH | HE2_144                                                                                           | HE2_150 | HE2_155 | HE2_168 | HE2_184 | HE2_191 | HE2_264 | HE2_274 |
| 16  | 1W1X | HD1_104                                                                                           | HE2_119 | HD1_150 | HE2_156 | HE2_191 | HE2_240 | HE2_281 | HD1_319 |
| 17  | 1W1X | HD1_104                                                                                           | HE2_104 | HD1_119 | HD1_150 | HD1_156 | HE2_191 | HE2_240 | HE2_281 |
| 18  | 1W1X | HD1_104                                                                                           | HE2_104 | HD1_119 | HD1_150 | HE2_156 | HE2_191 | HE2_240 | HE2_281 |
| 19  | 1W1X | HD1_104                                                                                           | HE2_119 | HD1_150 | HD1_156 | HE2_191 | HE2_240 | HE2_281 | HD1_319 |
| 20  | 1W20 | HD1_104                                                                                           | HE2_119 | HD1_150 | HD1_156 | HE2_191 | HE2_240 | HE2_281 | HD1_319 |
| 21  | 1W20 | HD1_104                                                                                           | HE2_119 | HD1_150 | HD1_156 | HE2_191 | HE2_240 | HE2_281 | HD1_319 |
| 22  | 1W20 | HD1_104                                                                                           | HE2_119 | HD1_150 | HE2_156 | HE2_191 | HE2_240 | HE2_281 | HD1_319 |
| 23  | 1W20 | HD1_104                                                                                           | HE2_119 | HD1_150 | HD1_156 | HE2_191 | HE2_240 | HE2_281 | HD1_319 |
| 24  | 1W21 | HD1_104                                                                                           | HE2_119 | HD1_150 | HD1_156 | HE2_191 | HE2_240 | HE2_281 | HD1_319 |
| 25  | 1W21 | HD1_104                                                                                           | HE2_119 | HD1_150 | HD1_156 | HE2_191 | HE2_240 | HE2_281 | HD1_319 |
| 26  | 1W21 | HD1_104                                                                                           | HE2_119 | HD1_150 | HE2_156 | HE2_191 | HE2_240 | HE2_281 | HD1_319 |
| 27  | 1W21 | HD1_104                                                                                           | HE2_119 | HD1_150 | HD1_156 | HE2_191 | HE2_240 | HE2_281 | HD1_319 |
| 28  | 1MVE | HD1_98                                                                                            | HD1_144 | HE2_150 | HE2_184 | HE2_233 | HE2_274 | HD1_312 |         |
| 29  | 2QWB | HD1_98                                                                                            | HD1_144 | HE2_150 | HE2_184 | HE2_233 | HE2_274 | HD1_312 |         |
| 30  | 1INY | HD1_98                                                                                            | HE2_144 | HE2_150 | HE2_185 | HE2_234 | HE2_275 | HD1_313 |         |
| 31  | 1INY | HD1_98                                                                                            | HE2_144 | HE2_150 | HE2_185 | HE2_234 | HE2_275 | HD1_313 |         |
| 32  | 1F8B | HD1_98                                                                                            | HD1_144 | HE2_150 | HE2_184 | HE2_233 | HE2_274 | HD1_312 |         |
| 33  | 1NNB | HD1_99                                                                                            | HE2_145 | HE2_151 | HE2_186 | HE2_235 | HD1_276 | HD1_314 |         |
| 34  | 2QWC | HD1_98                                                                                            | HD1_144 | HE2_150 | HE2_184 | HE2_233 | HE2_274 | HD1_312 |         |
| 35  | 1F8C | HD1_98                                                                                            | HD1_144 | HE2_150 | HE2_184 | HE2_233 | HE2_274 | HD1_312 |         |
| 37  | 1F8D | HD1_98                                                                                            | HD1_144 | HE2_150 | HE2_184 | HE2_233 | HE2_274 | HD1_312 |         |
| 37  | 2QWD | HD1_98                                                                                            | HD1_144 | HE2_150 | HE2_184 | HE2_233 | HE2_274 | HD1_312 |         |
| 38  | 1F8E | HD1_98                                                                                            | HD1_144 | HE2_150 | HE2_184 | HE2_233 | HE2_274 | HD1_312 |         |
| 39  | 1NNC | HD1_98                                                                                            | HD1_144 | HE2_150 | HE2_184 | HE2_233 | HE2_274 | HD1_312 |         |
| 40  | 2QWE | HD1_98                                                                                            | HD1_144 | HE2_150 | HE2_184 | HE2_233 | HE2_274 | HD1_312 |         |
| 41  | 1BJI | HD1_98                                                                                            | HD1_144 | HE2_150 | HE2_184 | HE2_233 | HD1_274 | HE2_274 | HD1_312 |

|    |      |         |         |         |         |         |         |         |         |
|----|------|---------|---------|---------|---------|---------|---------|---------|---------|
| 42 | 2QWF | HD1_98  | HD1_144 | HE2_150 | HE2_184 | HE2_233 | HD1_274 | HE2_274 | HD1_312 |
| 43 | 2QWI | HD1_98  | HD1_144 | HE2_150 | HE2_184 | HE2_233 | HD1_274 | HE2_274 | HD1_312 |
| 44 | 2QWG | HD1_98  | HD1_144 | HE2_150 | HE2_184 | HE2_233 | HD1_274 | HE2_274 | HD1_312 |
| 45 | 2QWJ | HD1_98  | HD1_144 | HE2_150 | HE2_184 | HE2_233 | HE2_274 | HD1_312 |         |
| 46 | 2QWH | HD1_98  | HD1_144 | HE2_150 | HE2_184 | HE2_233 | HE2_274 | HD1_312 |         |
| 47 | 2QWK | HD1_98  | HD1_144 | HE2_150 | HE2_184 | HE2_233 | HD1_274 | HE2_274 | HD1_312 |
| 48 | 1L7F | HD1_98  | HE2_144 | HE2_150 | HE2_184 | HE2_233 | HD1_274 | HE2_274 | HD1_312 |
| 49 | 1L7G | HD1_98  | HE2_144 | HE2_150 | HE2_184 | HE2_233 | HD1_274 | HE2_274 | HD1_312 |
| 50 | 1L7H | HD1_98  | HE2_144 | HE2_150 | HE2_184 | HE2_233 | HD1_274 | HE2_274 | HD1_312 |
| 51 | 1XOE | HD1_99  | HE2_145 | HE2_151 | HE2_186 | HE2_235 | HD1_276 | HD1_314 |         |
| 52 | 1XOG | HD1_99  | HE2_145 | HD1_151 | HE2_186 | HE2_235 | HE2_276 | HD1_314 |         |
| 53 | 1NSC | HD1_100 | HD1_128 | HE2_133 | HD1_154 | HE2_172 | HE2_182 | HE2_214 | HD1_272 |
| 54 | 1NSC | HD1_100 | HD1_128 | HE2_133 | HD1_154 | HE2_172 | HE2_182 | HE2_214 | HD1_272 |
| 55 | 1INV | HD1_101 | HD1_129 | HE2_134 | HD1_155 | HE2_173 | HE2_183 | HE2_215 | HD1_219 |
| 56 | 1INV | HD1_101 | HD1_129 | HE2_134 | HD1_155 | HE2_173 | HE2_183 | HE2_215 | HD1_219 |
| 57 | 1NSD | HD1_100 | HD1_128 | HE2_133 | HD1_154 | HE2_172 | HE2_182 | HE2_214 | HD1_272 |
| 58 | 1NSD | HD1_100 | HD1_128 | HE2_133 | HD1_154 | HD1_172 | HE2_182 | HE2_214 | HD1_272 |
| 59 | 1A4G | HD1_100 | HD1_128 | HE2_133 | HD1_154 | HE2_172 | HE2_182 | HE2_214 | HD1_272 |
| 60 | 1A4G | HD1_100 | HD1_128 | HE2_133 | HD1_154 | HE2_172 | HE2_182 | HE2_214 | HD1_272 |
| 61 | 1A4Q | HD1_100 | HD1_128 | HE2_133 | HD1_154 | HE2_172 | HE2_182 | HE2_214 | HD1_272 |
| 62 | 1A4Q | HD1_100 | HD1_128 | HE2_133 | HD1_154 | HE2_172 | HE2_182 | HE2_214 | HD1_272 |
| 63 | 1IVB | HD1_101 | HD1_129 | HE2_134 | HD1_155 | HD1_173 | HE2_183 | HE2_215 | HD1_219 |
| 64 | 1INF | HD1_101 | HD1_129 | HE2_134 | HD1_155 | HD1_173 | HE2_183 | HD1_215 | HD1_219 |
| 65 | 1B9S | HD1_101 | HD1_129 | HE2_134 | HD1_155 | HD1_173 | HE2_183 | HE2_215 | HD1_219 |
| 66 | 1VCJ | HD1_101 | HD1_129 | HE2_134 | HD1_155 | HD1_173 | HE2_183 | HD1_215 | HE2_219 |
| 67 | 1VCJ | HD1_101 | HD1_129 | HE2_134 | HD1_155 | HD1_173 | HE2_183 | HD1_215 | HE2_219 |
| 68 | 1B9V | HD1_101 | HD1_129 | HE2_134 | HD1_155 | HD1_173 | HE2_183 | HD1_215 | HE2_219 |
| 69 | 1B9V | HD1_101 | HD1_129 | HE2_134 | HD1_155 | HD1_173 | HE2_183 | HD1_215 | HE2_219 |
| 70 | 1B9T | HD1_101 | HD1_129 | HE2_134 | HD1_155 | HE2_173 | HE2_183 | HD1_215 | HD1_219 |

## Tables S4-S5

### Whole inhibitor

| NA strain | structure       |           | inh inhibitor | inh charge | ARG 118 | ASP 151 | ARG 152 | ARG 224 |
|-----------|-----------------|-----------|---------------|------------|---------|---------|---------|---------|
| N2        | 2BAT            | Asp339Asn | SIA           | -1         | -257    | 269     | -218    | -144    |
| N2        | 1INW            | wt        | AXP           | -2         | -507    | 439     | -397    | -291    |
| N2        | 1INW            | wt        | AXP-H         | -1         | -284    | 217     | -243    | -152    |
| N2        | 1INX            | wt        | EQP           | -2         | -522    | 459     | -415    | -282    |
| N2        | 1INX            | wt        | EQP-H         | -1         | -294    | 224     | -256    | -142    |
| N2        | 1IVF            | wt        | DAN           | -1         | -238    | 236     | -255    | -180    |
| N2        | 1IVD            | wt        | ST1           | -1         | -258    | 237     | -220    | -179    |
| N2        | 1IVC            | wt        | ST2           | -1         | -281    | 246     | -252    | -125    |
| N2        | 1IVC            | wt        | ST2-H         | 0          | -94     | -3      | -20     | 70      |
| N2        | 1IVE            | wt        | ST3           | -1         | -231    | 261     | -213    | -136    |
| N2        | 1IVE            | wt        | ST3-H         | 0          | -55     | -11     | 21      | 53      |
| N2        | 1ING A          | wt        | ST5           | -1         | -216    | 236     | -186    | -138    |
| N2        | 1ING B          | wt        | ST5           | -1         | -216    | 237     | -186    | -137    |
| N2        | 1ING averaged   | wt        | ST5           | -1         | -216    | 237     | -186    | -137    |
| N2        | 1INH A          | wt        | ST6           | 0          | -134    | 90      | -12     | 116     |
| N2        | 1INH B          | wt        | ST6           | 0          | -134    | 90      | -12     | 116     |
| N2        | 1INH averaged   | wt        | ST6           | 0          | -134    | 90      | -12     | 116     |
| N6        | 1W1X A          | wt        | SIA           | -1         | -252    | 281     | -246    | -127    |
| N6        | 1W1X B          | wt        | SIA           | -1         | -230    | 198     | -268    | -146    |
| N6        | 1W1X C          | wt        | SIA           | -1         | -281    | 289     | -248    | -141    |
| N6        | 1W1X D          | wt        | SIA           | -1         | -292    | 287     | -235    | -127    |
| N6        | 1W20 IA         | wt        | SIA           | -1         | -278    | 291     | -236    | -120    |
| N6        | 1W20 B          | wt        | SIA           | -1         | -273    | 284     | -250    | -127    |
| N6        | 1W20 C          | wt        | SIA           | -1         | -290    | 288     | -239    | -123    |
| N6        | 1W20 D          | wt        | SIA           | -1         | -275    | 289     | -242    | -134    |
| N6        | 1W21 A          | wt        | SIA           | -1         | -278    | 291     | -236    | -120    |
| N6        | 1W21 B          | wt        | SIA           | -1         | -273    | 284     | -250    | -127    |
| N6        | 1W21 C          | wt        | SIA           | -1         | -290    | 288     | -239    | -123    |
| N6        | 1W21 D          | wt        | SIA           | -1         | -275    | 289     | -242    | -134    |
| N6        | N6:SIA averaged | wt        | SIA           | -1         | -274    | 280     | -244    | -129    |
| N9        | 1MVE            | wt        | SIA           | -1         | -310    | 234     | -243    | -128    |
| N9        | 2QWB            | Arg292Lys | SIA           | -1         | -280    | 242     | -229    | -126    |
| N9        | 1INY            | Ser370Lys | EQP           | -2         | -490    | 373     | -373    | -279    |
| N9        | 1INY            | Ser370Lys | EQP-H         | -1         | -246    | 147     | -222    | -148    |
| N9        | 1F8B            | wt        | DAN           | -1         | -331    | 256     | -243    | -128    |
| N9        | 1NNB            | wt        | DAN           | -1         | -302    | 258     | -243    | -116    |
| N9        | N9:DAN averaged | wt        | DAN           | -1         | -317    | 257     | -243    | -122    |
| N9        | 2QWC            | Arg292Lys | DAN           | -1         | -301    | 250     | -263    | -134    |
| N9        | 1F8C            | wt        | 4AM           | 0          | -103    | -166    | -30     | 30      |
| N9        | 2QWD            | Arg292Lys | 4AM           | 0          | -95     | -141    | -10     | 55      |
| N9        | 1F8D            | wt        | 9AM           | 0          | -159    | 68      | -57     | 113     |
| N9        | 1F8E            | wt        | 49A           | 1          | 39      | -284    | 150     | 285     |
| N9        | 1NNC            | wt        | GNA           | 0          | -125    | -76     | -18     | 42      |

|    |               |           |       |    |      |      |      |      |
|----|---------------|-----------|-------|----|------|------|------|------|
| N9 | 2QWE          | Arg292Lys | GNA   | 0  | -129 | -84  | -38  | 57   |
| N9 | 1BJI          | wt        | G21   | 0  | -109 | -89  | -20  | 57   |
| N9 | 2QWF          | Arg292Lys | G20   | 0  | -149 | -61  | -24  | 81   |
| N9 | 2QWI          | wt        | G20   | 0  | -150 | -50  | -15  | 72   |
| N9 | 2QWG          | Arg292Lys | G28   | 0  | -134 | -114 | -36  | 65   |
| N9 | 2QWJ          | wt        | G28   | 0  | -126 | -99  | -43  | 66   |
| N9 | 2QWH          | Arg292Lys | G39   | 0  | -115 | -95  | -37  | 53   |
| N9 | 2QWK          | wt        | G39   | 0  | -109 | -160 | -31  | 62   |
| N9 | 1L7F          | wt        | BCZ   | 0  | -151 | -113 | -37  | 52   |
| N9 | 1L7G          | Glu119Gly | BCZ   | 0  | -138 | -116 | -37  | 52   |
| N9 | 1L7H          | Arg292Lys | BCZ   | 0  | -141 | -114 | -34  | 54   |
| N9 | 1XOE          | wt        | ABX   | 0  | -104 | -29  | -49  | 64   |
| N9 | 1XOG          | wt        | ABW   | -1 | -278 | 213  | -219 | -131 |
| B  | 1NSC A        | wt        | SIA   | -1 | -266 | 192  | -255 | -140 |
| B  | 1NSC B        | wt        | SIA   | -1 | -246 | 181  | -264 | -147 |
| B  | 1NSC averaged | wt        | SIA   | -1 | -256 | 187  | -260 | -144 |
| B  | 1INV          | wt        | EQP   | -2 | -572 | 457  | -371 | -263 |
| B  | 1INV          | wt        | EQP-H | -1 | -328 | 227  | -219 | -125 |
| B  | 1NSD A        | wt        | DAN   | -1 | -297 | 244  | -266 | -141 |
| B  | 1NSD B        | wt        | DAN   | -1 | -272 | 242  | -257 | -145 |
| B  | 1NSD averaged | wt        | DAN   | -1 | -284 | 243  | -261 | -143 |
| B  | 1A4G A        | wt        | ZMR   | 0  | -135 | -44  | -50  | 56   |
| B  | 1A4G B        | wt        | ZMR   | 0  | -126 | -30  | -28  | 52   |
| B  | 1A4G averaged | wt        | ZMR   | 0  | -131 | -37  | -39  | 54   |
| B  | 1A4Q A        | wt        | DPC   | 0  | -115 | -64  | -49  | 61   |
| B  | 1A4Q B        | wt        | DPC   | 0  | -109 | -49  | -42  | 61   |
| B  | 1A4Q averaged | wt        | DPC   | 0  | -112 | -57  | -45  | 61   |
| B  | 1IVB          | wt        | ST1   | -1 | -300 | 255  | -242 | -165 |
| B  | 1INF          | Arg382Lys | ST4   | 0  | -114 | 43   | -3   | 89   |
| B  | 1B9S          | wt        | FDI   | -1 | -270 | 257  | -195 | -134 |
| B  | 1VCJ          | wt        | IBA   | 0  | -166 | 98   | -37  | 146  |
| B  | 1VCJ          | wt        | IBA-H | 1  | -6   | -125 | 188  | 371  |
| B  | 1B9V          | wt        | RA2   | -1 | -300 | 274  | -228 | -138 |
| B  | 1B9V          | wt        | RA2-H | 0  | -140 | 64   | -21  | 94   |
| B  | 1B9T          | wt        | RAI   | 0  | -160 | 55   | -6   | 77   |

## C2-group

| NA strain | structure |           | inhibitor | inh charge | ARG 118 | ASP 151 | ARG 152 | ARG 22. |
|-----------|-----------|-----------|-----------|------------|---------|---------|---------|---------|
| N2        | 2BAT      | Asp339Asn | SIA       | -1         | -224    | 191     | -97     | -8      |
| N2        | 1INW      | wt        | AXP       | -2         | -441    | 334     | -209    | -18     |
| N2        | 1INW      | wt        | AXP-H     | -1         | -245    | 148     | -90     | -8      |
| N2        | 1INX      | wt        | EQP       | -2         | -450    | 353     | -218    | -18     |
| N2        | 1INX      | wt        | EQP-H     | -1         | -249    | 155     | -94     | -8      |
| N2        | 1IVF      | wt        | DAN       | -1         | -136    | 87      | -51     | -4      |
| N2        | 1IVD      | wt        | ST1       | -1         | -215    | 169     | -98     | -9      |
| N2        | 1IVC      | wt        | ST2       | -1         | -234    | 194     | -114    | -9      |
| N2        | 1IVC      | wt        | ST2-H     | 0          | -204    | 164     | -97     | -8      |
| N2        | 1IVE      | wt        | ST3       | -1         | -195    | 196     | -114    | -9      |

|    |                 |           |       |    |      |     |      |     |
|----|-----------------|-----------|-------|----|------|-----|------|-----|
| N2 | 1IVE            | wt        | ST3-H | 0  | -169 | 167 | -97  | -8  |
| N2 | 1ING A          | wt        | ST5   | -1 | -180 | 155 | -98  | -9  |
| N2 | 1ING B          | wt        | ST5   | -1 | -180 | 155 | -98  | -9  |
| N2 | 1ING averaged   | wt        | ST5   | -1 | -180 | 155 | -98  | -9  |
| N2 | 1INH A          | wt        | ST6   | 0  | -216 | 171 | -92  | -8  |
| N2 | 1INH B          | wt        | ST6   | 0  | -216 | 171 | -92  | -8  |
| N2 | 1INH averaged   | wt        | ST6   | 0  | -216 | 171 | -92  | -8  |
| N6 | 1W1X A          | wt        | SIA   | -1 | -213 | 186 | -105 | -9  |
| N6 | 1W1X B          | wt        | SIA   | -1 | -202 | 128 | -102 | -9  |
| N6 | 1W1X C          | wt        | SIA   | -1 | -245 | 204 | -108 | -8  |
| N6 | 1W1X D          | wt        | SIA   | -1 | -252 | 193 | -106 | -8  |
| N6 | 1W20 IA         | wt        | SIA   | -1 | -239 | 202 | -106 | -8  |
| N6 | 1W20 B          | wt        | SIA   | -1 | -235 | 195 | -108 | -8  |
| N6 | 1W20 C          | wt        | SIA   | -1 | -251 | 200 | -107 | -8  |
| N6 | 1W20 D          | wt        | SIA   | -1 | -238 | 202 | -108 | -8  |
| N6 | 1W21 A          | wt        | SIA   | -1 | -239 | 202 | -106 | -8  |
| N6 | 1W21 B          | wt        | SIA   | -1 | -235 | 195 | -108 | -8  |
| N6 | 1W21 C          | wt        | SIA   | -1 | -251 | 200 | -107 | -8  |
| N6 | 1W21 D          | wt        | SIA   | -1 | -238 | 202 | -108 | -8  |
| N6 | N6:SIA averaged | wt        | SIA   | -1 | -236 | 192 | -106 | -8  |
| N9 | 1MVE            | wt        | SIA   | -1 | -263 | 145 | -93  | -8  |
| N9 | 2QWB            | Arg292Lys | SIA   | -1 | -231 | 151 | -103 | -9  |
| N9 | 1INY            | Ser370Lys | EQP   | -2 | -431 | 331 | -206 | -17 |
| N9 | 1INY            | Ser370Lys | EQP-H | -1 | -213 | 141 | -90  | -8  |
| N9 | 1F8B            | wt        | DAN   | -1 | -205 | 78  | -49  | -4  |
| N9 | 1NNB            | wt        | DAN   | -1 | -173 | 73  | -48  | -4  |
| N9 | N9:DAN averaged | wt        | DAN   | -1 | -189 | 76  | -49  | -4  |
| N9 | 2QWC            | Arg292Lys | DAN   | -1 | -194 | 78  | -49  | -4  |
| N9 | 1F8C            | wt        | 4AM   | 0  | -187 | 68  | -44  | -4  |
| N9 | 2QWD            | Arg292Lys | 4AM   | 0  | -175 | 65  | -43  | -4  |
| N9 | 1F8D            | wt        | 9AM   | 0  | -173 | 70  | -44  | -4  |
| N9 | 1F8E            | wt        | 49A   | 1  | -167 | 59  | -39  | -3  |
| N9 | 1NNC            | wt        | GNA   | 0  | -177 | 66  | -41  | -3  |
| N9 | 2QWE            | Arg292Lys | GNA   | 0  | -180 | 65  | -41  | -3  |
| N9 | 1BJI            | wt        | G21   | 0  | -172 | 69  | -47  | -4  |
| N9 | 2QWF            | Arg292Lys | G20   | 0  | -185 | 69  | -44  | -4  |
| N9 | 2QWI            | wt        | G20   | 0  | -186 | 65  | -42  | -4  |
| N9 | 2QWG            | Arg292Lys | G28   | 0  | -204 | 68  | -46  | -4  |
| N9 | 2QWJ            | wt        | G28   | 0  | -194 | 68  | -46  | -4  |
| N9 | 2QWH            | Arg292Lys | G39   | 0  | -253 | 145 | -93  | -8  |
| N9 | 2QWK            | wt        | G39   | 0  | -249 | 144 | -94  | -8  |
| N9 | 1L7F            | wt        | BCZ   | 0  | -251 | 103 | -74  | -7  |
| N9 | 1L7G            | Glu119Gly | BCZ   | 0  | -237 | 102 | -73  | -7  |
| N9 | 1L7H            | Arg292Lys | BCZ   | 0  | -239 | 102 | -73  | -7  |
| N9 | 1XOE            | wt        | ABX   | 0  | -183 | 84  | -60  | -6  |
| N9 | 1XOG            | wt        | ABW   | -1 | -209 | 127 | -85  | -8  |
| B  | 1NSC A          | wt        | SIA   | -1 | -225 | 118 | -94  | -9  |
| B  | 1NSC B          | wt        | SIA   | -1 | -222 | 116 | -93  | -9  |
| B  | 1NSC averaged   | wt        | SIA   | -1 | -224 | 117 | -94  | -9  |



|   |               |           |       |    |      |     |      |     |
|---|---------------|-----------|-------|----|------|-----|------|-----|
| B | 1INV          | wt        | EQP   | -2 | -501 | 340 | -207 | -18 |
| B | 1INV          | wt        | EQP-H | -1 | -285 | 146 | -90  | -8  |
| B | 1NSD A        | wt        | DAN   | -1 | -177 | 75  | -48  | -4  |
| B | 1NSD B        | wt        | DAN   | -1 | -163 | 75  | -47  | -4  |
| B | 1NSD averaged | wt        | DAN   | -1 | -170 | 75  | -47  | -4  |
| B | 1A4G A        | wt        | ZMR   | 0  | -187 | 65  | -42  | -3  |
| B | 1A4G B        | wt        | ZMR   | 0  | -176 | 63  | -41  | -3  |
| B | 1A4G averaged | wt        | ZMR   | 0  | -181 | 64  | -42  | -3  |
| B | 1A4Q A        | wt        | DPC   | 0  | -184 | 70  | -47  | -4  |
| B | 1A4Q B        | wt        | DPC   | 0  | -180 | 70  | -47  | -4  |
| B | 1A4Q averaged | wt        | DPC   | 0  | -182 | 70  | -47  | -4  |
| B | 1IVB          | wt        | ST1   | -1 | -263 | 160 | -97  | -9  |
| B | 1INF          | Arg382Lys | ST4   | 0  | -213 | 153 | -89  | -8  |
| B | 1B9S          | wt        | FDI   | -1 | -225 | 166 | -105 | -10 |
| B | 1VCJ          | wt        | IBA   | 0  | -241 | 155 | -103 | -9  |
| B | 1VCJ          | wt        | IBA-H | 1  | -228 | 143 | -95  | -8  |
| B | 1B9V          | wt        | RA2   | -1 | -244 | 163 | -104 | -9  |
| B | 1B9V          | wt        | RA2-H | 0  | -230 | 151 | -96  | -9  |
| B | 1B9T          | wt        | RAI   | 0  | -254 | 140 | -89  | -8  |

## Tables S6-S7

### C3-group

| NA strain | structure       |           | inh inhibitor | inh charge | ARG 118 | ASP 151 | ARG 152 | ARG 224 |
|-----------|-----------------|-----------|---------------|------------|---------|---------|---------|---------|
| N2        | 2BAT            | Asp339Asn | SIA           | -1         | 32      | -36     | 11      | 8       |
| N2        | 1INW            | wt        | AXP           | -2         | 23      | -25     | 8       | 5       |
| N2        | 1INW            | wt        | AXP-H         | -1         | 28      | -31     | 11      | 8       |
| N2        | 1INX            | wt        | EQP           | -2         | 19      | -37     | 11      | 6       |
| N2        | 1INX            | wt        | EQP-H         | -1         | 24      | -43     | 14      | 8       |
| N2        | 1IVF            | wt        | DAN           | -1         | -47     | 56      | -37     | -32     |
| N2        | 1IVD            | wt        | ST1           | -1         | 32      | -35     | 7       | 5       |
| N2        | 1IVC            | wt        | ST2           | -1         | 10      | 1       | -1      | 1       |
| N2        | 1IVC            | wt        | ST2-H         | 0          | 23      | -13     | 9       | 10      |
| N2        | 1IVE            | wt        | ST3           | -1         | 14      | -4      | -2      | -1      |
| N2        | 1IVE            | wt        | ST3-H         | 0          | 30      | -21     | 7       | 6       |
| N2        | 1ING A          | wt        | ST5           | -1         | 27      | -12     | 5       | 4       |
| N2        | 1ING B          | wt        | ST5           | -1         | 27      | -12     | 5       | 4       |
| N2        | 1ING averaged   | wt        | ST5           | -1         | 27      | -12     | 5       | 4       |
| N2        | 1INH A          | wt        | ST6           | 0          | 30      | -27     | 9       | 6       |
| N2        | 1INH B          | wt        | ST6           | 0          | 30      | -27     | 9       | 6       |
| N2        | 1INH averaged   | wt        | ST6           | 0          | 30      | -27     | 9       | 6       |
| N6        | 1W1X A          | wt        | SIA           | -1         | 31      | -32     | 12      | 8       |
| N6        | 1W1X B          | wt        | SIA           | -1         | 30      | -30     | 12      | 8       |
| N6        | 1W1X C          | wt        | SIA           | -1         | 31      | -32     | 12      | 8       |
| N6        | 1W1X D          | wt        | SIA           | -1         | 31      | -28     | 11      | 8       |
| N6        | 1W20 IA         | wt        | SIA           | -1         | 31      | -31     | 11      | 8       |
| N6        | 1W20 B          | wt        | SIA           | -1         | 30      | -29     | 11      | 9       |
| N6        | 1W20 C          | wt        | SIA           | -1         | 30      | -30     | 11      | 9       |
| N6        | 1W20 D          | wt        | SIA           | -1         | 30      | -30     | 11      | 9       |
| N6        | 1W21 A          | wt        | SIA           | -1         | 31      | -31     | 11      | 8       |
| N6        | 1W21 B          | wt        | SIA           | -1         | 30      | -29     | 11      | 9       |
| N6        | 1W21 C          | wt        | SIA           | -1         | 30      | -30     | 11      | 9       |
| N6        | 1W21 D          | wt        | SIA           | -1         | 30      | -30     | 11      | 9       |
| N6        | N6:SIA averaged | wt        | SIA           | -1         | 31      | -30     | 11      | 8       |
| N9        | 1MVE            | wt        | SIA           | -1         | 31      | -31     | 12      | 8       |
| N9        | 2QWB            | Arg292Lys | SIA           | -1         | 31      | -38     | 12      | 8       |
| N9        | 1INY            | Ser370Lys | EQP           | -2         | 18      | -33     | 11      | 6       |
| N9        | 1INY            | Ser370Lys | EQP-H         | -1         | 22      | -39     | 14      | 8       |
| N9        | 1F8B            | wt        | DAN           | -1         | -45     | 53      | -37     | -32     |
| N9        | 1NNB            | wt        | DAN           | -1         | -46     | 51      | -38     | -32     |
| N9        | N9:DAN averaged | wt        | DAN           | -1         | -46     | 52      | -37     | -32     |
| N9        | 2QWC            | Arg292Lys | DAN           | -1         | -45     | 56      | -37     | -32     |
| N9        | 1F8C            | wt        | 4AM           | 0          | -41     | 48      | -34     | -30     |
| N9        | 2QWD            | Arg292Lys | 4AM           | 0          | -40     | 52      | -34     | -30     |
| N9        | 1F8D            | wt        | 9AM           | 0          | -41     | 49      | -34     | -29     |
| N9        | 1F8E            | wt        | 49A           | 1          | -37     | 45      | -32     | -28     |
| N9        | 1NNC            | wt        | GNA           | 0          | -38     | 47      | -32     | -29     |

|    |               |           |       |    |     |     |     |     |
|----|---------------|-----------|-------|----|-----|-----|-----|-----|
| N9 | 2QWE          | Arg292Lys | GNA   | 0  | -38 | 49  | -33 | -29 |
| N9 | 1BJI          | wt        | G21   | 0  | -49 | 54  | -35 | -31 |
| N9 | 2QWF          | Arg292Lys | G20   | 0  | -39 | 44  | -34 | -29 |
| N9 | 2QWI          | wt        | G20   | 0  | -40 | 48  | -34 | -30 |
| N9 | 2QWG          | Arg292Lys | G28   | 0  | -46 | 57  | -36 | -30 |
| N9 | 2QWJ          | wt        | G28   | 0  | -47 | 54  | -36 | -30 |
| N9 | 2QWH          | Arg292Lys | G39   | 0  | 44  | -53 | 21  | 16  |
| N9 | 2QWK          | wt        | G39   | 0  | 43  | -52 | 21  | 16  |
| N9 | 1L7F          | wt        | BCZ   | 0  | 21  | -20 | 7   | 6   |
| N9 | 1L7G          | Glu119Gly | BCZ   | 0  | 21  | -19 | 7   | 6   |
| N9 | 1L7H          | Arg292Lys | BCZ   | 0  | 21  | -16 | 6   | 6   |
| N9 | 1XOE          | wt        | ABX   | 0  | 27  | -27 | 10  | 8   |
| N9 | 1XOG          | wt        | ABW   | -1 | 19  | -22 | 6   | 4   |
| B  | 1NSC A        | wt        | SIA   | -1 | 30  | -31 | 12  | 9   |
| B  | 1NSC B        | wt        | SIA   | -1 | 31  | -34 | 12  | 9   |
| B  | 1NSC averaged | wt        | SIA   | -1 | 31  | -32 | 12  | 9   |
| B  | 1INV          | wt        | EQP   | -2 | 20  | -26 | 9   | 6   |
| B  | 1INV          | wt        | EQP-H | -1 | 25  | -32 | 12  | 8   |
| B  | 1NSD A        | wt        | DAN   | -1 | -47 | 54  | -37 | -33 |
| B  | 1NSD B        | wt        | DAN   | -1 | -49 | 55  | -36 | -33 |
| B  | 1NSD averaged | wt        | DAN   | -1 | -48 | 54  | -37 | -33 |
| B  | 1A4G A        | wt        | ZMR   | 0  | -38 | 52  | -33 | -30 |
| B  | 1A4G B        | wt        | ZMR   | 0  | -38 | 50  | -34 | -30 |
| B  | 1A4G averaged | wt        | ZMR   | 0  | -38 | 51  | -34 | -30 |
| B  | 1A4Q A        | wt        | DPC   | 0  | -47 | 59  | -36 | -31 |
| B  | 1A4Q B        | wt        | DPC   | 0  | -47 | 59  | -36 | -32 |
| B  | 1A4Q averaged | wt        | DPC   | 0  | -47 | 59  | -36 | -32 |
| B  | 1IVB          | wt        | ST1   | -1 | 27  | -24 | 7   | 5   |
| B  | 1INF          | Arg382Lys | ST4   | 0  | 30  | -31 | 9   | 7   |
| B  | 1B9S          | wt        | FDI   | -1 | 15  | -7  | 0   | -1  |
| B  | 1VCJ          | wt        | IBA   | 0  | 14  | -10 | 2   | 1   |
| B  | 1VCJ          | wt        | IBA-H | 1  | 21  | -18 | 6   | 5   |
| B  | 1B9V          | wt        | RA2   | -1 | 14  | -11 | 0   | -1  |
| B  | 1B9V          | wt        | RA2-H | 0  | 22  | -19 | 5   | 3   |
| B  | 1B9T          | wt        | RAI   | 0  | 30  | -25 | 9   | 7   |

## C4-group

| NA strain | structure |           | inh inhibitor | inh charge | ARG 118 | ASP 151 | ARG 152 | ARG 224 |
|-----------|-----------|-----------|---------------|------------|---------|---------|---------|---------|
| N2        | 2BAT      | Asp339Asn | SIA           | -1         | -2      | 18      | -20     | -1      |
| N2        | 1INW      | wt        | AXP           | -2         | -8      | 15      | -27     | -1      |
| N2        | 1INW      | wt        | AXP-H         | -1         | -4      | 10      | -23     | -1      |
| N2        | 1INX      | wt        | EQP           | -2         | -17     | 27      | -23     | -       |
| N2        | 1INX      | wt        | EQP-H         | -1         | -13     | 22      | -19     | -       |
| N2        | 1IVF      | wt        | DAN           | -1         | -4      | 12      | -23     | -1      |
| N2        | 1IVD      | wt        | ST1           | -1         | -27     | 37      | -19     | -1      |
| N2        | 1IVC      | wt        | ST2           | -1         | -3      | 9       | -1      | 1       |
| N2        | 1IVC      | wt        | ST2-H         | 0          | 118     | -141    | 136     | 14      |
| N2        | 1IVE      | wt        | ST3           | -1         | 15      | -30     | 20      | 1       |

|    |                 |           |       |    |     |      |     |    |
|----|-----------------|-----------|-------|----|-----|------|-----|----|
| N2 | 1IVE            | wt        | ST3-H | 0  | -2  | 1    | -14 | -1 |
| N2 | 1ING A          | wt        | ST5   | -1 | 12  | -13  | 9   |    |
| N2 | 1ING B          | wt        | ST5   | -1 | 12  | -13  | 9   |    |
| N2 | 1ING averaged   | wt        | ST5   | -1 | 12  | -13  | 9   |    |
| N2 | 1INH A          | wt        | ST6   | 0  | 13  | -22  | 13  |    |
| N2 | 1INH B          | wt        | ST6   | 0  | 13  | -22  | 13  |    |
| N2 | 1INH averaged   | wt        | ST6   | 0  | 13  | -22  | 13  |    |
| N6 | 1W1X A          | wt        | SIA   | -1 | -2  | 27   | -21 | -1 |
| N6 | 1W1X B          | wt        | SIA   | -1 | -2  | 24   | -22 | -1 |
| N6 | 1W1X C          | wt        | SIA   | -1 | -2  | 21   | -22 | -1 |
| N6 | 1W1X D          | wt        | SIA   | -1 | -2  | 23   | -21 | -1 |
| N6 | 1W20 IA         | wt        | SIA   | -1 | -2  | 25   | -21 | -1 |
| N6 | 1W20 B          | wt        | SIA   | -1 | -2  | 22   | -22 | -1 |
| N6 | 1W20 C          | wt        | SIA   | -1 | -2  | 21   | -22 | -1 |
| N6 | 1W20 D          | wt        | SIA   | -1 | -2  | 22   | -22 | -1 |
| N6 | 1W21 A          | wt        | SIA   | -1 | -2  | 25   | -21 | -1 |
| N6 | 1W21 B          | wt        | SIA   | -1 | -2  | 22   | -22 | -1 |
| N6 | 1W21 C          | wt        | SIA   | -1 | -2  | 21   | -22 | -1 |
| N6 | 1W21 D          | wt        | SIA   | -1 | -2  | 22   | -22 | -1 |
| N6 | N6:SIA averaged | wt        | SIA   | -1 | -2  | 23   | -22 | -1 |
| N9 | 1MVE            | wt        | SIA   | -1 | -16 | 32   | -15 | -  |
| N9 | 2QWB            | Arg292Lys | SIA   | -1 | -17 | 33   | -15 | -  |
| N9 | 1INY            | Ser370Lys | EQP   | -2 | -10 | -26  | -17 | -1 |
| N9 | 1INY            | Ser370Lys | EQP-H | -1 | -6  | -32  | -13 | -1 |
| N9 | 1F8B            | wt        | DAN   | -1 | -20 | 28   | -18 | -  |
| N9 | 1NNB            | wt        | DAN   | -1 | -19 | 34   | -18 | -  |
| N9 | N9:DAN averaged | wt        | DAN   | -1 | -19 | 31   | -18 | -  |
| N9 | 2QWC            | Arg292Lys | DAN   | -1 | -6  | 24   | -25 | -1 |
| N9 | 1F8C            | wt        | 4AM   | 0  | 145 | -318 | 149 | 10 |
| N9 | 2QWD            | Arg292Lys | 4AM   | 0  | 150 | -310 | 145 | 10 |
| N9 | 1F8D            | wt        | 9AM   | 0  | 1   | 17   | -19 | -  |
| N9 | 1F8E            | wt        | 49A   | 1  | 154 | -275 | 157 | 10 |
| N9 | 1NNC            | wt        | GNA   | 0  | 101 | -215 | 117 | 9  |
| N9 | 2QWE            | Arg292Lys | GNA   | 0  | 102 | -221 | 123 | 9  |
| N9 | 1BJI            | wt        | G21   | 0  | 136 | -273 | 124 | 8  |
| N9 | 2QWF            | Arg292Lys | G20   | 0  | 91  | -216 | 116 | 8  |
| N9 | 2QWI            | wt        | G20   | 0  | 90  | -204 | 110 | 8  |
| N9 | 2QWG            | Arg292Lys | G28   | 0  | 141 | -297 | 138 | 9  |
| N9 | 2QWJ            | wt        | G28   | 0  | 140 | -278 | 139 | 9  |
| N9 | 2QWH            | Arg292Lys | G39   | 0  | 132 | -244 | 127 | 9  |
| N9 | 2QWK            | wt        | G39   | 0  | 132 | -307 | 131 | 8  |
| N9 | 1L7F            | wt        | BCZ   | 0  | 63  | -164 | 83  | 5  |
| N9 | 1L7G            | Glu119Gly | BCZ   | 0  | 62  | -166 | 84  | 5  |
| N9 | 1L7H            | Arg292Lys | BCZ   | 0  | 63  | -160 | 83  | 5  |
| N9 | 1XOE            | wt        | ABX   | 0  | -43 | 30   | -35 | -3 |
| N9 | 1XOG            | wt        | ABW   | -1 | -61 | 53   | -54 | -4 |
| B  | 1NSC A          | wt        | SIA   | -1 | -19 | 30   | -12 | -  |
| B  | 1NSC B          | wt        | SIA   | -1 | -3  | 24   | -21 | -1 |
| B  | 1NSC averaged   | wt        | SIA   | -1 | -11 | 27   | -17 | -  |

|   |               |           |       |    |     |      |     |    |
|---|---------------|-----------|-------|----|-----|------|-----|----|
| B | 1INV          | wt        | EQP   | -2 | -21 | 37   | -18 | -  |
| B | 1INV          | wt        | EQP-H | -1 | -17 | 32   | -14 | -  |
| B | 1NSD A        | wt        | DAN   | -1 | -22 | 35   | -17 | -  |
| B | 1NSD B        | wt        | DAN   | -1 | -7  | 31   | -25 | -1 |
| B | 1NSD averaged | wt        | DAN   | -1 | -14 | 33   | -21 | -  |
| B | 1A4G A        | wt        | ZMR   | 0  | 106 | -197 | 121 | 9  |
| B | 1A4G B        | wt        | ZMR   | 0  | 105 | -179 | 122 | 8  |
| B | 1A4G averaged | wt        | ZMR   | 0  | 106 | -188 | 122 | 9  |
| B | 1A4Q A        | wt        | DPC   | 0  | 140 | -252 | 126 | 8  |
| B | 1A4Q B        | wt        | DPC   | 0  | 140 | -236 | 127 | 8  |
| B | 1A4Q averaged | wt        | DPC   | 0  | 140 | -244 | 126 | 8  |
| B | 1IVB          | wt        | ST1   | -1 | -8  | 20   | -24 | -1 |
| B | 1INF          | Arg382Lys | ST4   | 0  | 16  | -26  | 14  | 1  |
| B | 1B9S          | wt        | FDI   | -1 | 4   | -9   | 4   |    |
| B | 1VCJ          | wt        | IBA   | 0  | 7   | -11  | 5   |    |
| B | 1VCJ          | wt        | IBA-H | 1  | 13  | -19  | 10  |    |
| B | 1B9V          | wt        | RA2   | -1 | 4   | -11  | 4   |    |
| B | 1B9V          | wt        | RA2-H | 0  | 10  | -19  | 10  |    |
| B | 1B9T          | wt        | RAI   | 0  | 16  | -23  | 14  | 1  |

## Tables S8-S9

### C5-group

| NA strain | structure |           | inhibitor | inh charge | ARG 118 | ASP 151 | ARG 152 | ARG 224 |
|-----------|-----------|-----------|-----------|------------|---------|---------|---------|---------|
| N2        | 2BAT      | Asp339Asn | SIA       | -1         | -14     | 24      | -71     | -15     |
| N2        | 1INW      | wt        | AXP       | -2         | -11     | 25      | -100    | -14     |
| N2        | 1INW      | wt        | AXP-H     | -1         | -3      | 13      | -86     | -1      |
| N2        | 1INX      | wt        | EQP       | -2         | -13     | 29      | -99     | -8      |
| N2        | 1INX      | wt        | EQP-H     | -1         | -5      | 17      | -85     | 5       |
| N2        | 1IVF      | wt        | DAN       | -1         | -5      | 13      | -72     | -1      |
| N2        | 1IVD      | wt        | ST1       | -1         | -20     | 30      | -69     | -24     |
| N2        | 1IVC      | wt        | ST2       | -1         | -54     | 91      | -119    | -35     |
| N2        | 1IVC      | wt        | ST2-H     | 0          | -16     | 30      | -40     | 24      |
| N2        | 1IVE      | wt        | ST3       | -1         | -54     | 81      | -123    | -67     |
| N2        | 1IVE      | wt        | ST3-H     | 0          | -13     | 3       | -50     | -17     |
| N2        | 1ING A    | wt        | ST5       | -1         | -32     | 63      | -76     | -15     |
| N2        | 1ING B    | wt        | ST5       | -1         | -32     | 63      | -76     | -15     |
|           | 1ING      |           |           |            |         |         |         |         |
| N2        | averaged  | wt        | ST5       | -1         | -32     | 63      | -76     | -15     |
| N2        | 1INH A    | wt        | ST6       | 0          | -19     | 44      | -31     | 10      |
| N2        | 1INH B    | wt        | ST6       | 0          | -19     | 44      | -31     | 10      |
|           | 1INH      |           |           |            |         |         |         |         |
| N2        | averaged  | wt        | ST6       | 0          | -19     | 44      | -31     | 10      |
| N6        | 1W1X A    | wt        | SIA       | -1         | -15     | 29      | -86     | -13     |
| N6        | 1W1X B    | wt        | SIA       | -1         | -14     | 27      | -100    | -15     |
| N6        | 1W1X C    | wt        | SIA       | -1         | -15     | 27      | -89     | -12     |
| N6        | 1W1X D    | wt        | SIA       | -1         | -15     | 28      | -76     | -13     |
| N6        | 1W20 IA   | wt        | SIA       | -1         | -15     | 24      | -83     | -13     |
| N6        | 1W20 B    | wt        | SIA       | -1         | -15     | 27      | -91     | -13     |
| N6        | 1W20 C    | wt        | SIA       | -1         | -15     | 26      | -81     | -12     |
| N6        | 1W20 D    | wt        | SIA       | -1         | -15     | 25      | -84     | -14     |
| N6        | 1W21 A    | wt        | SIA       | -1         | -15     | 24      | -83     | -13     |
| N6        | 1W21 B    | wt        | SIA       | -1         | -15     | 27      | -91     | -13     |
| N6        | 1W21 C    | wt        | SIA       | -1         | -15     | 26      | -81     | -12     |
| N6        | 1W21 D    | wt        | SIA       | -1         | -15     | 25      | -84     | -14     |
|           | N6:SIA    |           |           |            |         |         |         |         |
| N6        | averaged  | wt        | SIA       | -1         | -15     | 26      | -86     | -13     |
| N9        | 1MVE      | wt        | SIA       | -1         | -14     | 21      | -106    | -15     |
| N9        | 2QWB      | Arg292Lys | SIA       | -1         | -14     | 25      | -80     | -13     |
| N9        | 1INY      | Ser370Lys | EQP       | -2         | -10     | 24      | -78     | -12     |
| N9        | 1INY      | Ser370Lys | EQP-H     | -1         | -3      | 13      | -64     | 0       |
| N9        | 1F8B      | wt        | DAN       | -1         | -5      | 17      | -80     | 4       |
| N9        | 1NNB      | wt        | DAN       | -1         | -6      | 9       | -75     | 11      |
|           | N9:DAN    |           |           |            |         |         |         |         |
| N9        | averaged  | wt        | DAN       | -1         | -6      | 13      | -77     | 8       |
| N9        | 2QWC      | Arg292Lys | DAN       | -1         | -4      | 13      | -82     | 3       |
| N9        | 1F8C      | wt        | 4AM       | 0          | 8       | -3      | -58     | 28      |
| N9        | 2QWD      | Arg292Lys | 4AM       | 0          | 7       | -5      | -49     | 30      |
| N9        | 1F8D      | wt        | 9AM       | 0          | 8       | -6      | -56     | 24      |
| N9        | 1F8E      | wt        | 49A       | 1          | 19      | -22     | -42     | 45      |

|    |          |           |       |    |      |     |      |      |
|----|----------|-----------|-------|----|------|-----|------|------|
| N9 | 1NNC     | wt        | GNA   | 0  | 11   | -9  | -24  | 39   |
| N9 | 2QWE     | Arg292Lys | GNA   | 0  | 11   | -14 | -50  | 40   |
| N9 | 1BJI     | wt        | G21   | 0  | -8   | 19  | -61  | 1    |
| N9 | 2QWF     | Arg292Lys | G20   | 0  | 4    | 3   | -55  | 30   |
| N9 | 2QWI     | wt        | G20   | 0  | 5    | 1   | -37  | 28   |
| N9 | 2QWG     | Arg292Lys | G28   | 0  | -1   | 6   | -71  | 13   |
| N9 | 2QWJ     | wt        | G28   | 0  | -2   | 8   | -78  | 12   |
| N9 | 2QWH     | Arg292Lys | G39   | 0  | -10  | 22  | -90  | 3    |
| N9 | 2QWK     | wt        | G39   | 0  | -10  | 24  | -92  | 2    |
| N9 | 1L7F     | wt        | BCZ   | 0  | -20  | 50  | -110 | -16  |
| N9 | 1L7G     | Glu119Gly | BCZ   | 0  | -20  | 50  | -112 | -16  |
| N9 | 1L7H     | Arg292Lys | BCZ   | 0  | -20  | 50  | -110 | -15  |
| N9 | 1XOE     | wt        | ABX   | 0  | 3    | 13  | -88  | 8    |
| N9 | 1XOG     | wt        | ABW   | -1 | -17  | 41  | -88  | -30  |
| B  | 1NSC A   | wt        | SIA   | -1 | -14  | 22  | -107 | -15  |
| B  | 1NSC B   | wt        | SIA   | -1 | -14  | 22  | -108 | -15  |
| B  | 1NSC     |           |       |    |      |     |      |      |
| B  | averaged | wt        | SIA   | -1 | -14  | 22  | -108 | -15  |
| B  | 1INV     | wt        | EQP   | -2 | -11  | 25  | -80  | -13  |
| B  | 1INV     | wt        | EQP-H | -1 | -3   | 14  | -66  | 0    |
| B  | 1NSD A   | wt        | DAN   | -1 | -4   | 12  | -95  | 1    |
| B  | 1NSD B   | wt        | DAN   | -1 | -4   | 12  | -82  | 2    |
| B  | 1NSD     |           |       |    |      |     |      |      |
| B  | averaged | wt        | DAN   | -1 | -4   | 12  | -88  | 2    |
| B  | 1A4G A   | wt        | ZMR   | 0  | 13   | -18 | -66  | 38   |
| B  | 1A4G B   | wt        | ZMR   | 0  | 13   | -13 | -48  | 37   |
| B  | 1A4G     |           |       |    |      |     |      |      |
| B  | averaged | wt        | ZMR   | 0  | 13   | -15 | -57  | 38   |
| B  | 1A4Q A   | wt        | DPC   | 0  | -7   | 15  | -89  | 0    |
| B  | 1A4Q B   | wt        | DPC   | 0  | -6   | 14  | -83  | -1   |
| B  | 1A4Q     |           |       |    |      |     |      |      |
| B  | averaged | wt        | DPC   | 0  | -7   | 14  | -86  | 0    |
| B  | 1IVB     | wt        | ST1   | -1 | -27  | 60  | -88  | -7   |
| B  | 1INF     | Arg382Lys | ST4   | 0  | -12  | 30  | -32  | 10   |
| B  | 1B9S     | wt        | FDI   | -1 | -24  | 47  | -39  | -12  |
| B  | 1VCJ     | wt        | IBA   | 0  | 11   | 28  | -34  | 120  |
| B  | 1VCJ     | wt        | IBA-H | 1  | 52   | -32 | 31   | 182  |
| B  | 1B9V     | wt        | RA2   | -1 | -100 | 163 | -180 | -125 |
| B  | 1B9V     | wt        | RA2-H | 0  | -61  | 108 | -119 | -68  |
| B  | 1B9T     | wt        | RAI   | 0  | -17  | 44  | -37  | 8    |

## C6-group

| NA strain | structure |           | inhibitor | inh charge | ARG 118 | ASP 151 | ARG 152 | ARG 224 |
|-----------|-----------|-----------|-----------|------------|---------|---------|---------|---------|
| N2        | 2BAT      | Asp339Asn | SIA       | -1         | 1       | 13      | -1      |         |
| N2        | 1INW      | wt        | AXP       | -2         | -21     | 33      | -25     | -4      |
| N2        | 1INW      | wt        | AXP-H     | -1         | -11     | 20      | -12     | -2      |
| N2        | 1INX      | wt        | EQP       | -2         | -13     | 22      | -38     | -4      |
| N2        | 1INX      | wt        | EQP-H     | -1         | -2      | 9       | -25     | -2      |
| N2        | 1IVF      | wt        | DAN       | -1         | 0       | 5       | -30     | -5      |

|    |                 |           |       |    |     |      |     |    |
|----|-----------------|-----------|-------|----|-----|------|-----|----|
| N2 | 1IVD            | wt        | ST1   | -1 | -33 | 45   | -49 | -6 |
| N2 | 1IVC            | wt        | ST2   | -1 | -3  | -32  | -19 | -  |
| N2 | 1IVC            | wt        | ST2-H | 0  | -29 | -10  | -40 | -3 |
| N2 | 1IVE            | wt        | ST3   | -1 | -9  | 16   | 5   | 1  |
| N2 | 1IVE            | wt        | ST3-H | 0  | 91  | -148 | 164 | 15 |
| N2 | 1ING A          | wt        | ST5   | -1 | -49 | 53   | -33 | -5 |
| N2 | 1ING B          | wt        | ST5   | -1 | -49 | 53   | -33 | -4 |
| N2 | 1ING averaged   | wt        | ST5   | -1 | -49 | 53   | -33 | -5 |
| N2 | 1INH A          | wt        | ST6   | 0  | 49  | -62  | 79  | 16 |
| N2 | 1INH B          | wt        | ST6   | 0  | 49  | -62  | 79  | 16 |
| N2 | 1INH averaged   | wt        | ST6   | 0  | 49  | -62  | 79  | 16 |
| N6 | 1W1X A          | wt        | SIA   | -1 | -3  | 17   | -5  | 2  |
| N6 | 1W1X B          | wt        | SIA   | -1 | 7   | -4   | -14 | -  |
| N6 | 1W1X C          | wt        | SIA   | -1 | 1   | 11   | 2   | -  |
| N6 | 1W1X D          | wt        | SIA   | -1 | -2  | 14   | -3  | 1  |
| N6 | 1W20 IA         | wt        | SIA   | -1 | -2  | 13   | 4   | 2  |
| N6 | 1W20 B          | wt        | SIA   | -1 | -2  | 13   | 1   | 1  |
| N6 | 1W20 C          | wt        | SIA   | -1 | -2  | 14   | 2   | 2  |
| N6 | 1W20 D          | wt        | SIA   | -1 | 0   | 13   | 1   | 1  |
| N6 | 1W21 A          | wt        | SIA   | -1 | -2  | 13   | 4   | 2  |
| N6 | 1W21 B          | wt        | SIA   | -1 | -2  | 13   | 1   | 1  |
| N6 | 1W21 C          | wt        | SIA   | -1 | -2  | 14   | 2   | 2  |
| N6 | 1W21 D          | wt        | SIA   | -1 | 0   | 13   | 1   | 1  |
| N6 | N6:SIA averaged | wt        | SIA   | -1 | -1  | 12   | 0   | 1  |
| N9 | 1MVE            | wt        | SIA   | -1 | 2   | 7    | 3   | 1  |
| N9 | 2QWB            | Arg292Lys | SIA   | -1 | 0   | 12   | 0   | 1  |
| N9 | 1IN Y           | Ser370Lys | EQP   | -2 | -11 | 22   | -38 | -4 |
| N9 | 1IN Y           | Ser370Lys | EQP-H | -1 | -1  | 9    | -26 | -2 |
| N9 | 1F8B            | wt        | DAN   | -1 | -11 | 24   | -18 | -  |
| N9 | 1NNB            | wt        | DAN   | -1 | -13 | 37   | -24 | -  |
| N9 | N9:DAN averaged | wt        | DAN   | -1 | -12 | 31   | -21 | -  |
| N9 | 2QWC            | Arg292Lys | DAN   | -1 | -6  | 18   | -28 | -1 |
| N9 | 1F8C            | wt        | 4AM   | 0  | 16  | -16  | -3  | -  |
| N9 | 2QWD            | Arg292Lys | 4AM   | 0  | 7   | -2   | 11  | 3  |
| N9 | 1F8D            | wt        | 9AM   | 0  | 90  | -118 | 136 | 20 |
| N9 | 1F8E            | wt        | 49A   | 1  | 114 | -146 | 145 | 23 |
| N9 | 1NNC            | wt        | GNA   | 0  | 21  | -19  | 2   | 1  |
| N9 | 2QWE            | Arg292Lys | GNA   | 0  | 19  | -21  | 4   | 3  |
| N9 | 1BJI            | wt        | G21   | 0  | 29  | -18  | 39  | 8  |
| N9 | 2QWF            | Arg292Lys | G20   | 0  | 24  | -20  | 35  | 7  |
| N9 | 2QWI            | wt        | G20   | 0  | 25  | -20  | 30  | 7  |
| N9 | 2QWG            | Arg292Lys | G28   | 0  | 22  | -9   | 21  | 6  |
| N9 | 2QWJ            | wt        | G28   | 0  | 22  | -9   | 20  | 7  |
| N9 | 2QWH            | Arg292Lys | G39   | 0  | 24  | -23  | 35  | 6  |
| N9 | 2QWK            | wt        | G39   | 0  | 25  | -27  | 40  | 7  |
| N9 | 1L7F            | wt        | BCZ   | 0  | 46  | -64  | 70  | 8  |
| N9 | 1L7G            | Glu119Gly | BCZ   | 0  | 46  | -64  | 69  | 8  |
| N9 | 1L7H            | Arg292Lys | BCZ   | 0  | 46  | -65  | 71  | 9  |
| N9 | 1XOE            | wt        | ABX   | 0  | 63  | -87  | 91  | 11 |



|    |               |           |       |    |     |      |     |    |
|----|---------------|-----------|-------|----|-----|------|-----|----|
| N9 | 1XOG          | wt        | ABW   | -1 | 40  | -50  | 50  | 6  |
| B  | 1NSC A        | wt        | SIA   | -1 | 12  | -9   | -10 |    |
| B  | 1NSC B        | wt        | SIA   | -1 | 12  | -9   | -10 |    |
| B  | 1NSC averaged | wt        | SIA   | -1 | 12  | -9   | -10 |    |
| B  | 1INV          | wt        | EQP   | -2 | -9  | 16   | -29 | -2 |
| B  | 1INV          | wt        | EQP-H | -1 | 1   | 3    | -16 | -  |
| B  | 1NSD A        | wt        | DAN   | -1 | -3  | 11   | -28 | -1 |
| B  | 1NSD B        | wt        | DAN   | -1 | -3  | 12   | -27 | -1 |
| B  | 1NSD averaged | wt        | DAN   | -1 | -3  | 12   | -27 | -1 |
| B  | 1A4G A        | wt        | ZMR   | 0  | 14  | -6   | 11  | 3  |
| B  | 1A4G B        | wt        | ZMR   | 0  | 14  | -6   | 12  | 3  |
| B  | 1A4G averaged | wt        | ZMR   | 0  | 14  | -6   | 11  | 3  |
| B  | 1A4Q A        | wt        | DPC   | 0  | 29  | -15  | 38  | 8  |
| B  | 1A4Q B        | wt        | DPC   | 0  | 30  | -18  | 39  | 8  |
| B  | 1A4Q averaged | wt        | DPC   | 0  | 29  | -16  | 39  | 8  |
| B  | 1IVB          | wt        | ST1   | -1 | -34 | 47   | -47 | -6 |
| B  | 1INF          | Arg382Lys | ST4   | 0  | 56  | -70  | 85  | 13 |
| B  | 1B9S          | wt        | FDI   | -1 | -39 | 60   | -56 | -2 |
| B  | 1VCJ          | wt        | IBA   | 0  | 42  | -61  | 89  | 11 |
| B  | 1VCJ          | wt        | IBA-H | 1  | 129 | -192 | 229 | 25 |
| B  | 1B9V          | wt        | RA2   | -1 | 26  | -33  | 50  | 8  |
| B  | 1B9V          | wt        | RA2-H | 0  | 114 | -153 | 175 | 23 |
| B  | 1B9T          | wt        | RAI   | 0  | 54  | -68  | 85  | 12 |

**Table S10****O-group**

| NA strain | structure       |           | inhibitor | inh charge | ARG 118 | ASP 151 | ARG 152 | ARG 224 |
|-----------|-----------------|-----------|-----------|------------|---------|---------|---------|---------|
| N2        | 2BAT            | Asp339Asn | SIA       | -1         | -50     | 59      | -41     | -43     |
| N2        | 1INW            | wt        | AXP       | -2         | -50     | 57      | -44     | -43     |
| N2        | 1INW            | wt        | AXP-H     | -1         | -49     | 56      | -43     | -43     |
| N2        | 1INX            | wt        | EQP       | -2         | -49     | 64      | -47     | -43     |
| N2        | 1INX            | wt        | EQP-H     | -1         | -49     | 64      | -47     | -42     |
| N2        | 1IVF            | wt        | DAN       | -1         | -46     | 61      | -42     | -38     |
| N2        | 1IVD            | wt        | ST1       | -1         | 6       | -7      | 8       | 9       |
| N2        | 1IVC            | wt        | ST2       | -1         | 2       | -16     | 1       | 1       |
| N2        | 1IVC            | wt        | ST2-H     | 0          | 13      | -35     | 13      | 8       |
| N2        | 1IVE            | wt        | ST3       | -1         | -2      | 3       | 1       | 1       |
| N2        | 1IVE            | wt        | ST3-H     | 0          | 7       | -12     | 11      | 9       |
| N2        | 1ING A          | wt        | ST5       | -1         | 4       | -9      | 7       | 8       |
| N2        | 1ING B          | wt        | ST5       | -1         | 4       | -9      | 7       | 8       |
| N2        | 1ING averaged   | wt        | ST5       | -1         | 4       | -9      | 7       | 8       |
| N2        | 1INH A          | wt        | ST6       | 0          | 9       | -13     | 9       | 10      |
| N2        | 1INH B          | wt        | ST6       | 0          | 9       | -13     | 9       | 10      |
| N2        | 1INH averaged   | wt        | ST6       | 0          | 9       | -13     | 9       | 10      |
| N6        | 1W1X A          | wt        | SIA       | -1         | -50     | 55      | -41     | -44     |
| N6        | 1W1X B          | wt        | SIA       | -1         | -49     | 54      | -42     | -44     |
| N6        | 1W1X C          | wt        | SIA       | -1         | -51     | 58      | -42     | -43     |
| N6        | 1W1X D          | wt        | SIA       | -1         | -51     | 55      | -41     | -42     |
| N6        | 1W20 IA         | wt        | SIA       | -1         | -51     | 58      | -42     | -43     |
| N6        | 1W20 B          | wt        | SIA       | -1         | -50     | 56      | -42     | -43     |
| N6        | 1W20 C          | wt        | SIA       | -1         | -50     | 57      | -42     | -43     |
| N6        | 1W20 D          | wt        | SIA       | -1         | -51     | 57      | -42     | -43     |
| N6        | 1W21 A          | wt        | SIA       | -1         | -51     | 58      | -42     | -43     |
| N6        | 1W21 B          | wt        | SIA       | -1         | -50     | 56      | -42     | -43     |
| N6        | 1W21 C          | wt        | SIA       | -1         | -50     | 57      | -42     | -43     |
| N6        | 1W21 D          | wt        | SIA       | -1         | -51     | 57      | -42     | -43     |
| N6        | N6:SIA averaged | wt        | SIA       | -1         | -50     | 57      | -42     | -43     |
| N9        | 1MVE            | wt        | SIA       | -1         | -49     | 59      | -43     | -43     |
| N9        | 2QWB            | Arg292Lys | SIA       | -1         | -49     | 59      | -43     | -42     |
| N9        | 1INY            | Ser370Lys | EQP       | -2         | -47     | 57      | -44     | -42     |
| N9        | 1INY            | Ser370Lys | EQP-H     | -1         | -46     | 56      | -44     | -41     |
| N9        | 1F8B            | wt        | DAN       | -1         | -45     | 56      | -41     | -39     |
| N9        | 1NNB            | wt        | DAN       | -1         | -45     | 54      | -40     | -39     |
| N9        | N9:DAN averaged | wt        | DAN       | -1         | -45     | 55      | -40     | -39     |
| N9        | 2QWC            | Arg292Lys | DAN       | -1         | -45     | 60      | -41     | -38     |
| N9        | 1F8C            | wt        | 4AM       | 0          | -44     | 54      | -40     | -38     |
| N9        | 2QWD            | Arg292Lys | 4AM       | 0          | -45     | 58      | -41     | -37     |
| N9        | 1F8D            | wt        | 9AM       | 0          | -44     | 56      | -40     | -37     |
| N9        | 1F8E            | wt        | 49A       | 1          | -43     | 54      | -39     | -36     |
| N9        | 1NNC            | wt        | GNA       | 0          | -43     | 54      | -38     | -38     |
| N9        | 2QWE            | Arg292Lys | GNA       | 0          | -43     | 58      | -40     | -37     |

|    |               |           |       |    |     |     |     |     |
|----|---------------|-----------|-------|----|-----|-----|-----|-----|
| N9 | 1BJI          | wt        | G21   | 0  | -46 | 60  | -40 | -37 |
| N9 | 2QWF          | Arg292Lys | G20   | 0  | -43 | 58  | -41 | -36 |
| N9 | 2QWI          | wt        | G20   | 0  | -44 | 61  | -41 | -37 |
| N9 | 2QWG          | Arg292Lys | G28   | 0  | -46 | 61  | -42 | -37 |
| N9 | 2QWJ          | wt        | G28   | 0  | -46 | 58  | -42 | -37 |
| N9 | 2QWH          | Arg292Lys | G39   | 0  | -51 | 58  | -37 | -33 |
| N9 | 2QWK          | wt        | G39   | 0  | -51 | 57  | -37 | -32 |
| N9 | 1L7F          | wt        | BCZ   | 0  | -11 | -18 | -13 | -13 |
| N9 | 1L7G          | Glu119Gly | BCZ   | 0  | -11 | -19 | -12 | -13 |
| N9 | 1L7H          | Arg292Lys | BCZ   | 0  | -11 | -24 | -12 | -13 |
| N9 | 1XOE          | wt        | ABX   | 0  | 28  | -42 | 33  | 31  |
| N9 | 1XOG          | wt        | ABW   | -1 | -50 | 63  | -47 | -43 |
| B  | 1NSC A        | wt        | SIA   | -1 | -50 | 61  | -43 | -43 |
| B  | 1NSC B        | wt        | SIA   | -1 | -50 | 63  | -43 | -43 |
| B  | 1NSC averaged | wt        | SIA   | -1 | -50 | 62  | -43 | -43 |
| B  | 1INV          | wt        | EQP   | -2 | -50 | 66  | -47 | -43 |
| B  | 1INV          | wt        | EQP-H | -1 | -49 | 65  | -46 | -42 |
| B  | 1NSD A        | wt        | DAN   | -1 | -45 | 56  | -41 | -40 |
| B  | 1NSD B        | wt        | DAN   | -1 | -45 | 57  | -40 | -40 |
| B  | 1NSD averaged | wt        | DAN   | -1 | -45 | 57  | -41 | -40 |
| B  | 1A4G A        | wt        | ZMR   | 0  | -44 | 59  | -40 | -37 |
| B  | 1A4G B        | wt        | ZMR   | 0  | -44 | 56  | -40 | -37 |
| B  | 1A4G averaged | wt        | ZMR   | 0  | -44 | 57  | -40 | -37 |
| B  | 1A4Q A        | wt        | DPC   | 0  | -46 | 60  | -40 | -37 |
| B  | 1A4Q B        | wt        | DPC   | 0  | -47 | 61  | -41 | -38 |
| B  | 1A4Q averaged | wt        | DPC   | 0  | -46 | 60  | -41 | -38 |
| B  | 1IVB          | wt        | ST1   | -1 | 6   | -8  | 7   | 9   |
| B  | 1INF          | Arg382Lys | ST4   | 0  | 9   | -13 | 11  | 12  |
| B  | 1B9S          | wt        | FDI   | -1 | -1  | 2   | 1   | 3   |
| B  | 1VCJ          | wt        | IBA   | 0  | 1   | -2  | 3   | 5   |
| B  | 1VCJ          | wt        | IBA-H | 1  | 6   | -8  | 8   | 9   |
| B  | 1B9V          | wt        | RA2   | -1 | -1  | 2   | 0   | 3   |
| B  | 1B9V          | wt        | RA2-H | 0  | 4   | -4  | 5   | 8   |
| B  | 1B9T          | wt        | RAI   | 0  | 9   | -12 | 10  | 12  |
